# Supplementary material for: Association between duration of use of pharmacotherapy and smoking cessation: findings from a national survey
Source: PubMed Central journal article supplement — BMJ Open. 2015 Jan 13;5(1):e006229. doi: 10.1136/bmjopen-2014-006229 (PMC4298107; doi:10.1136/bmjopen-2014-006229), 2015-01-13
Supplement: bmjopen-2014-006229.draft_revisions.pdf [file bmjopen-2014-006229.draft_revisions.pdf]

# BMJ Open

## Effectiveness of pharmacotherapy for smoking cessation in the general population: Duration of use matters

|                                 |                                                                                                                                                                                                                                                                                                                                                                                                                                                                                                                                                                                                                                                                                                                                                                                                                                                                                                 |
|---------------------------------|-------------------------------------------------------------------------------------------------------------------------------------------------------------------------------------------------------------------------------------------------------------------------------------------------------------------------------------------------------------------------------------------------------------------------------------------------------------------------------------------------------------------------------------------------------------------------------------------------------------------------------------------------------------------------------------------------------------------------------------------------------------------------------------------------------------------------------------------------------------------------------------------------|
| Journal:                        | <i>BMJ Open</i>                                                                                                                                                                                                                                                                                                                                                                                                                                                                                                                                                                                                                                                                                                                                                                                                                                                                                 |
| Manuscript ID:                  | bmjopen-2014-006229                                                                                                                                                                                                                                                                                                                                                                                                                                                                                                                                                                                                                                                                                                                                                                                                                                                                             |
| Article Type:                   | Research                                                                                                                                                                                                                                                                                                                                                                                                                                                                                                                                                                                                                                                                                                                                                                                                                                                                                        |
| Date Submitted by the Author:   | 25-Jul-2014                                                                                                                                                                                                                                                                                                                                                                                                                                                                                                                                                                                                                                                                                                                                                                                                                                                                                     |
| Complete List of Authors:       | Siahpush, Mohammad; University of Nebraska Medical Center, Department of Health Promotion, Social and Behavioral Health<br>Shaikh, Raees; College of Public Health - University of Nebraska Medical Center, Department of Health Promotion, Social and Behavioral Health<br>McCarthy, Molly; University of Nebraska Medical Center, Department of Health Promotion, Social and Behavioral Health<br>Sikora, Asia; University of Nebraska Medical Center, Department of Health Promotion, Social and Behavioral Health<br>Tibbits, Melissa; University of Nebraska Medical Center, Department of Health Promotion, Social and Behavioral Health; University of Nebraska Medical Center, Department of Health Promotion, Social and Behavioral Health<br>Singh, Gopal; Health Resources and Services Administration, Maternal and Child Health Bureau, US Department of Health and Human Services |
| <b>Primary Subject Heading</b>: | Smoking and tobacco                                                                                                                                                                                                                                                                                                                                                                                                                                                                                                                                                                                                                                                                                                                                                                                                                                                                             |
| Secondary Subject Heading:      | Addiction, Public health                                                                                                                                                                                                                                                                                                                                                                                                                                                                                                                                                                                                                                                                                                                                                                                                                                                                        |
| Keywords:                       | PREVENTIVE MEDICINE, PUBLIC HEALTH, SOCIAL MEDICINE                                                                                                                                                                                                                                                                                                                                                                                                                                                                                                                                                                                                                                                                                                                                                                                                                                             |
|                                 |                                                                                                                                                                                                                                                                                                                                                                                                                                                                                                                                                                                                                                                                                                                                                                                                                                                                                                 |

SCHOLARONE™  
Manuscripts

1  
2  
3  
4  
5  
6  
7  
8  
9  
10  
11  
12  
13  
14  
15  
16  
17  
18  
19  
20  
21  
22  
23  
24  
25  
26  
27  
28  
29  
30  
31  
32  
33  
34  
35  
36  
37  
38  
39  
40  
41  
42  
43  
44  
45  
46  
47  
48  
49  
50  
51  
52  
53  
54  
55  
56  
57  
58  
59  
60

**Effectiveness of pharmacotherapy for smoking cessation in the general population:  
Duration of use matters**

Mohammad Siahpush, PhD

Department of Health Promotion, Social and Behavioral Health  
College of Public Health | University of Nebraska Medical Center  
984365 Nebraska Medical Center | Omaha, NE 68198-4365 | USA

Corresponding author:

Raees A. Shaikh, MPH

Department of Health Promotion, Social and Behavioral Health  
College of Public Health | University of Nebraska Medical Center  
984365 Nebraska Medical Center | Omaha, NE 68198-4365 | USA  
Email: raees.shaikh@unmc.edu | Tel: 402-559-1936 | Fax: 402-559-3773

Molly McCarthy, MPH

Department of Health Promotion, Social and Behavioral Health  
College of Public Health | University of Nebraska Medical Center  
984365 Nebraska Medical Center | Omaha, NE 68198-4365 | USA

Asia Sikora, PhD

Department of Health Promotion, Social and Behavioral Health  
College of Public Health | University of Nebraska Medical Center  
984365 Nebraska Medical Center | Omaha, NE 68198-4365 | USA

Melissa Tibbits, PhD

Department of Health Promotion, Social and Behavioral Health  
College of Public Health | University of Nebraska Medical Center  
984365 Nebraska Medical Center | Omaha, NE 68198-4365 | USA

Gopal K. Singh, Ph.D., M.S., M.Sc.

U.S. Department of Health & Human Services  
5600 Fishers lane, Room 18-41 | Rockville, MD 20857 | USA

**Word Count:** 2582

**Key Words:** Pharmacotherapy for Cessation, Duration of Pharmacotherapy, Smoking Cessation, Assisted Cessation

**ABSTRACT**

**Aim:** To investigate the association of the duration of use of prescription medications and nicotine replacement therapy (NRT) with smoking cessation using a national sample of the general population in the United States, controlling for nicotine dependence and sociodemographic variables.

**Methods:** We used data from the 2010-2011 Tobacco Use Supplement to the US Current Population Survey. We limited the analysis to current daily smokers who made a quit attempt in the past year and former smokers who were a daily smoker one year prior to the survey (n = 8 263). Respondents were asked about duration of use of prescription medication (Varenicline, Bupropion, other) and NRT (nicotine patch, gum/lozenges, nasal spray, and inhaler) for smoking cessation.

**Results:** After adjusting for daily cigarette consumption and sociodemographic covariates, we found overwhelming evidence ( $p < 0.001$ ) for an association between duration of pharmacotherapy use and smoking cessation. Adjusted cessation rates for those who used prescription medication or NRT for 5+ weeks were 28.8% and 27.8%, respectively. Adjusted cessation rates for those who used prescription medication or NRT for less than five weeks varied from 6.2% to 14.5%. Adjusted cessation rates for those who used only behavioral counseling and those who attempted to quit smoking unassisted were 16.1% and 16.4%, respectively.

**Conclusion:** Pharmacotherapies for smoking cessation can be effective in the general population if used for at least five weeks. Encouraging smokers who intend to quit to use pharmacotherapy and to adhere to treatment duration can help improve chances of a successful cessation.

## ARTICLE SUMMARY

**Strengths and limitations of the study:**

- This was the first population-based study to examine the duration of use of prescription medication as well as NRT for smoking cessation as a predictor of successful smoking cessation, controlling for nicotine dependence and sociodemographic variables.
- A strength of this study was that it used a large nationally representative sample with a relatively high response rate.
- Our results strengthen the findings of clinical trials about the efficacy of pharmacotherapy for smoking cessation and indicate that these aids could also be effective in the general population if they are used for at least five weeks.
- Recall bias, especially related to the smokers previous quit attempts and the observational nature of the study precluding the establishment of a causal link were between the duration of pharmacotherapy use and successful smoking cessation, were the major limitations of this study.

## INTRODUCTION

1  
2  
3  
4  
5 Clinical trials provide strong evidence that pharmacotherapy for smoking cessation  
6  
7 including various forms of nicotine replacement therapies (NRT), Bupropion, or Varenicline  
8  
9 greatly increase the chances of a successful smoking cessation attempt.[1, 2] However,  
10  
11 observational population-based studies have shown mixed results. While some have shown  
12  
13 that pharmacotherapy increases smoking cessation rates,[3-6] others have concluded the  
14  
15 opposite.[7-11] Yet, other population-based studies have shown no difference in cessation  
16  
17 rates between those who use and those who do not use pharmacotherapy.[12, 13] The  
18  
19 population-based reports that have found no favorable effect of pharmacotherapy have been  
20  
21 criticized for not controlling for nicotine dependence,[14-16] which is a predictor of abstinence  
22  
23 and is usually higher among smokers who choose to use pharmacotherapy for smoking  
24  
25 cessation.[4, 14, 17, 18] Some of the analyses that have controlled for nicotine dependence  
26  
27 have found a favorable effect of pharmacotherapy on smoking cessation[3, 4, 19] but others  
28  
29 have not.[7]

30  
31  
32 An additional confounder that rarely is taken into account in population-based studies is  
33  
34 duration of use of pharmacotherapy, which has been found to be associated with treatment  
35  
36 success in clinical trials.[20-22] We know of one population-based study which examined the  
37  
38 association of duration of use of pharmacotherapy with smoking cessation and found no  
39  
40 association.[12] This study was conducted in the US where NRT can be purchased over the  
41  
42 counter and medications such as Bupropion and Varenicline can only be obtained as  
43  
44 prescription drugs.  
45  
46  
47  
48  
49  
50  
51  
52  
53  
54

55 While clinical trials have high internal validity and can provide evidence for the efficacy  
56  
57 of pharmacotherapy, observational population-based studies can address effectiveness of these  
58  
59  
60

1  
2 therapies under conditions that they are intended to be used.[14] Furthermore, while clinical  
3  
4 trials provide confidence in causal associations, population-based studies are strong in  
5  
6 representativeness and external validity. Thus, both are needed to advance the science of  
7  
8 smoking cessation.[19]  
9  
10

11  
12 There is no literature on population-based studies that examine the association of  
13  
14 duration of NRT and prescription medication use with smoking cessation. Our aim was to use a  
15  
16 large representative sample of the general population in the United States and investigate the  
17  
18 association of the duration of use of prescription medications and NRT with smoking cessation,  
19  
20 controlling for nicotine dependence and sociodemographic variables.  
21  
22  
23

## 24 **METHODS**

### 25 **Data**

26  
27 We used data from the 2010-2011 Tobacco Use Supplement to the Current Population  
28  
29 Survey (TUS-CPS), sponsored by the National Cancer Institute and administered by the US  
30  
31 Census Bureau in May 2010, August 2010, and January 2011.[23] The TUS-CPS is administered  
32  
33 as a part of the CPS, which is a monthly national survey of representative households by the US  
34  
35 Census Bureau and the Bureau of Labor Statistics.[24] The TUS-CPS utilizes a multistage  
36  
37 probability sampling of individuals 15 years and older, from a sample of approximately 56,000  
38  
39 housing units, in turn selected from 792 primary sampling units. The average response rate for  
40  
41 CPS for the 3 months of surveys used in this study was 93%, whereas for the TUS it was 63%.  
42  
43  
44  
45  
46  
47  
48  
49

### 50 **Measures**

#### 51 *Successful smoking cessation:*

52  
53  
54  
55 Individuals who reported to have smoked at least 100 cigarettes in their entire life but  
56  
57 were not smoking at all at the time of the interview were considered to have successfully quit  
58  
59  
60

1  
2 smoking (n = 1 769). Those who reported to have quit within the last four weeks were excluded  
3  
4 from the analysis (n = 322). Individuals who reported to have smoked at least 100 cigarettes in  
5  
6 their entire life, were smoking every day at the time of the interview and had made a quit  
7  
8 attempt in the past year were considered to have failed in their quit attempt (n = 7 304).  
9  
10 Individuals who reported to have used both prescription medication and NRT for smoking  
11  
12 cessation were excluded from the analysis (n = 488) because after subdividing this group by  
13  
14 categories of duration of use for prescription medication and NRT, some of the subgroup  
15  
16 sample sizes were extremely small. The total sample size for the study was 8 263 respondents,  
17  
18 consisting of 1 379 who successfully quit smoking and 6 884 whose quit attempt was not  
19  
20 successful.  
21  
22  
23  
24  
25

26  
27 *Assisted quit attempt and duration of pharmacotherapy use:*  
28

29  
30 Both daily and former smokers were asked in three separate questions to indicate  
31  
32 whether, in their last quit attempt in the past year, they used a prescription pill called (a)  
33  
34 Chantix or Varenicline, (b) Zyban, Bupropion, or Wellbutrin, or (b) other prescription pills. They  
35  
36 were also asked in three separate questions to indicate whether, in their last quit attempt, they  
37  
38 used (a) a nicotine patch, (b) nicotine gum or nicotine lozenge, or (c) nicotine nasal spray or  
39  
40 nicotine inhaler. They were also asked to indicate how many days, weeks or months they used  
41  
42 these prescription and/or NRT medications. Furthermore, both daily and former smokers were  
43  
44 asked three separate questions about use of behavioral counseling in their last quit attempt in  
45  
46 the past year. They were asked if they used a (a) telephone helpline or quitline, (b) one-on-one  
47  
48 counseling or (c) stop smoking clinic, class or support group. Based on the questions about use  
49  
50 of prescription medication, NRT and behavioral counseling, we created the following two  
51  
52 categorical variables:  
53  
54  
55  
56  
57  
58  
59  
60

1  
2 Method of quit attempt  
3

- 4
- 5 • Prescription medication only
  - 6
  - 7 • Prescription medication and behavioral counseling
  - 8
  - 9
  - 10 • NRT only
  - 11
  - 12 • NRT and behavioral counseling
  - 13
  - 14 • Behavioral counseling only
  - 15
  - 16
  - 17 • Unassisted
  - 18
  - 19

20 Duration of use of pharmacotherapy  
21

- 22
- 23 • Prescription medication: 5+ weeks
  - 24
  - 25 • Prescription medication: 3-4 weeks
  - 26
  - 27
  - 28 • Prescription medication: 1-2 weeks<sup>1</sup>
  - 29
  - 30 • NRT: 5+ weeks
  - 31
  - 32
  - 33 • NRT: 3-4 weeks
  - 34
  - 35 • NRT: 1-2 weeks
  - 36
  - 37
  - 38 • Behavioral counseling only
  - 39
  - 40
  - 41 • Unassisted
  - 42

43 We categorized duration of use of pharmacotherapy based on a systematic review of  
44 studies assessing adherence to smoking cessation medication.[20] In categorizing duration of  
45 use, we made no distinction between whether or not the medication was combined with  
46 behavioral counseling as this distinction was inconsequential in the analysis.  
47  
48  
49  
50  
51

52  
53 **Statistical analysis**  
54

55 We used multivariable logistic regression models to compute adjusted odds ratios for  
56 the association of the method of quit attempt and duration of use of pharmacotherapy with  
57  
58  
59  
60



1  
2 successful smoking cessation. Sampling weights were taken into account in the computation of  
3  
4 parameter estimates. We computed  $p$ -values using the jackknife, which is an unbiased  
5  
6 estimator for a statistic and a data-dependent method to calculate standard errors.[25] All  
7  
8 models controlled for daily cigarette consumption (current daily consumption among daily  
9  
10 smokers, and daily consumption 12 months ago among former smokers), age, race/ethnicity,  
11  
12 education, occupation, and family income. In order to account for the missing income data, CPS  
13  
14 uses one of the three imputation methods, relational imputation, longitudinal edits, or hot deck  
15  
16 allocation. Details of these methods are described elsewhere.[26] In multivariable logistic  
17  
18 regression models, we omitted observations that had a missing value for any of the covariates.  
19  
20 This constituted 1.7% of the full sample in the analysis pertaining to the method of quit attempt  
21  
22 (n = 142) and 6.3% of the full sample in the analysis pertaining to duration of pharmacotherapy  
23  
24 use (n = 491). We used the logistic regression results to compute adjusted cessation rates by  
25  
26 method of quit attempt and duration of use of pharmacotherapy. These adjusted rates were  
27  
28 computed by fixing covariates at their means in the fitted models.[27]  
29  
30  
31  
32  
33  
34  
35  
36

## 37 RESULTS

### 38 Sample characteristics and bivariate associations

39  
40  
41  
42  
43  
44  
45  
46  
47  
48  
49  
50  
51  
52  
53  
54  
55  
56  
57  
58  
59  
60

**Table 1. Weighted sample characteristics and unadjusted smoking cessation rates across categories of each covariate**

| Variable                             | % in sample | % quit | p- value |
|--------------------------------------|-------------|--------|----------|
| Method of quit attempt               |             |        | 0.074    |
| Prescription only                    | 10.01       | 18.54  |          |
| Prescription plus behavioral support | 1.14        | 23.8   |          |
| NRT only                             | 18.26       | 14.32  |          |
| NRT plus behavioral support          | 2.54        | 18.98  |          |
| Behavioral only                      | 1.36        | 18.59  |          |
| Unassisted                           | 66.68       | 17.16  |          |
| Duration of pharmacotherapy use      |             |        | <0.001   |
| Prescription: 5+ weeks               | 4.9         | 34.38  |          |
| Prescription: 3-4 weeks              | 1.43        | 16.82  |          |
| Prescription: 1-2 weeks              | 1.89        | 15.28  |          |
| NRT: 5+ weeks                        | 6.04        | 30.65  |          |
| NRT: 3-4 weeks                       | 1.48        | 19.9   |          |
| NRT: 1-2 weeks                       | 13.48       | 7.36   |          |
| Behavioral only                      | 1.42        | 18.59  |          |
| Unassisted                           | 69.36       | 17.16  |          |
| Cigarettes per day                   |             |        | <0.001   |
| 0-9                                  | 24.48       | 15.08  |          |
| 10-14                                | 30.04       | 12.58  |          |
| 15-19                                | 10.31       | 12.58  |          |
| 20-29                                | 29.23       | 21.83  |          |
| 30+                                  | 5.93        | 29.59  |          |
| Sex                                  |             |        | 0.975    |
| Female                               | 50.12       | 16.99  |          |
| Male                                 | 49.88       | 17.02  |          |
| Age                                  |             |        | < 0.001  |
| 18-24                                | 11.79       | 15.32  |          |
| 25-39                                | 33.08       | 18.17  |          |
| 40-54                                | 32.33       | 14.49  |          |
| 55+                                  | 22.8        | 19.77  |          |
| Race/Ethnicity                       |             |        | 0.003    |
| Non-Hispanic White                   | 76.17       | 17.99  |          |
| Non-Hispanic Black                   | 11.34       | 12.98  |          |
| Hispanic                             | 7.39        | 15.73  |          |
| Other                                | 5.09        | 13.15  |          |
| Education                            |             |        | <0.001   |
| Less than high school                | 15.25       | 13.15  |          |
| High school diploma                  | 73.34       | 16.74  |          |
| Bachelor's degree                    | 11.41       | 23.91  |          |
| Occupation                           |             |        | <0.001   |
| Professional                         | 14.33       | 20.99  |          |
| Service                              | 12.31       | 13.96  |          |
| Sales                                | 14.5        | 18.45  |          |
| Farming/construction/production      | 17.28       | 13.08  |          |
| Unemployed                           | 12.01       | 13.81  |          |
| Not in labor force                   | 29.57       | 19.24  |          |
| Family income                        |             |        | <0.001   |
| <\$25,000                            | 36.27       | 13.94  |          |
| \$25,000-\$49,000                    | 31.65       | 17.21  |          |
| \$50,000-\$99,000                    | 23.86       | 19.63  |          |
| \$100,000+                           | 8.23        | 22.17  |          |
| Full sample                          |             | 17.01  |          |

Note: Sample size for each covariate varies from 7 820 to 8 263 depending on the number of missing values for that covariate.

1  
2  
3  
4  
5  
6  
7  
8  
9  
10  
11  
12  
13  
14  
15  
16  
17  
18  
19  
20  
21  
22  
23  
24  
25  
26  
27  
28  
29  
30  
31  
32  
33  
34  
35  
36  
37  
38  
39  
40  
41  
42  
43  
44  
45  
46  
47  
48  
49  
50  
51  
52  
53  
54  
55  
56  
57  
58  
59  
60

Weighted sample characteristics are shown in Table 1. About 66.7% of the sample reported to have made an unassisted quit attempt; 10% used only prescription medication; 1.1% used prescription medication plus behavioral counseling; 18.2% used only NRT; 2.5% used NRT plus behavioral therapy; and 1.3% used only behavioral counseling. When broken down by duration of use, while most of those who used prescription medication did so for five or more weeks, the great majority of those who used NRT did so for 2 weeks or less. The reported number of cigarettes smoked per day was 14 or less for about 54.5% of the sample. Age was distributed with 11.8% of the sample under 25 years of age, 33% between 25-39 years, 32.3% between 40-54 years, and 22.8% 55 years or older. The sample was 76% non-Hispanic white, 11.3% non-Hispanic Black, 7.4% Hispanic, and 5% of other race/ethnicity. About 15.2% of the sample did not have a high school diploma, 73.3% had high school diploma, and 11.4% had at least a bachelor's degree. The distribution of family income was skewed such that over a third of the sample had an income of less than \$25 000 and less than a tenth of the sample had an income of \$100 000 or greater.

Table 1 also provides smoking cessation rates across categories of each covariate, indicating bivariate (unadjusted) associations between the covariates and quitting. Cessation rate was 17% in the whole sample. There was very little evidence that method of quit attempt was associated with cessation rate ( $p < 0.074$ ). However, there was overwhelming evidence that duration of pharmacotherapy use was associated with quitting ( $p < 0.001$ ) such that the use of prescription medication or NRT for 5+ weeks was associated with remarkably higher cessation rates compared to the use of these products for shorter durations, behavioral counseling or unassisted quit attempts. Number of cigarettes smoked per day had a curvilinear relationship with cessation such that those who smoked 0-9 cigarettes and those who smoked 20+ cigarettes per day had a higher cessation rate than others ( $P < 0.001$ ). Age had a curvilinear relationship with cessation in that individuals in the 25-39 and 55+ age categories had notably higher cessation rates than others ( $p < 0.001$ ). Race/ethnicity was associated with quitting such that Non-Hispanic Whites had the highest and non-Hispanic Blacks had the lowest cessation rates ( $p = 0.003$ ). Higher socioeconomic status as measured by education, occupation, and income was associated with a higher cessation rate ( $p < 0.001$  for all three indicators of socioeconomic status). Sex had no association with cessation.

## Adjusted results from multivariable logistic regression models

**Table 2. Adjusted<sup>a</sup> odds ratios and 95% confidence intervals (CI) for the association of method of quit attempt and duration of pharmacotherapy use with the probability of successful smoking cessation**

|                                             | OR (95% CI)      | p-value |
|---------------------------------------------|------------------|---------|
| Method of quit attempt (n = 8 121)          |                  | 0.025   |
| Prescription only                           | 1.00             |         |
| Prescription plus behavioral support        | 1.42 (0.76-2.66) |         |
| NRT only                                    | 0.78 (0.59-1.02) |         |
| NRT plus behavioral support                 | 1.17 (0.73-1.86) |         |
| Behavioral only                             | 1.06 (0.57-1.97) |         |
| Unassisted                                  | 1.09 (0.87-1.37) |         |
| Duration of pharmacotherapy use (n = 7 772) |                  | < 0.001 |
| Prescription: 5+ weeks                      | 1.00             |         |
| Prescription: 3-4 weeks                     | 0.42 (0.21-0.84) |         |
| Prescription: 1-2 weeks                     | 0.38 (0.22-0.66) |         |
| NRT: 5+ weeks                               | 0.95 (0.67-1.36) |         |
| NRT: 3-4 weeks                              | 0.53 (0.29-0.97) |         |
| NRT: 1-2 weeks                              | 0.16 (0.11-0.24) |         |
| Behavioral only                             | 0.47 (0.25-0.90) |         |
| Unassisted                                  | 0.48 (0.37-0.64) |         |

<sup>a</sup> Adjusted for the effect of number of cigarettes smoked per day, sex, age, race/ethnicity, education, occupation, and family income.

### Figure 1 here.....

Table 2 provides adjusted odds ratios for the association of method of quit attempt with the probability of smoking cessation. Figure 1 shows the adjusted cessation rates for various quitting methods. Unlike the unadjusted results in Table 1 which provided very little evidence of an association between quitting method and successful cessation, the adjusted results revealed some evidence of an association ( $p = 0.025$ ). The highest cessation rate was among those who used prescription medication and behavioral counseling (20.4%) followed by those who used NRT and behavioral counseling (17.4%), attempted to quit unassisted (16.4%), used behavioral counseling only (16.1%), and those who used prescription medication only (15.3%). The lowest cessation rate was among those who only used NRT as a quitting method (12.3%).

### Figure 2 here.....

Table 2 also provides adjusted odds ratios for the association of duration of pharmacotherapy use with the probability of smoking cessation. Figure 2 shows the adjusted cessation rates for various durations of pharmacotherapy use. Consistent with the unadjusted results in Table 1, the adjusted results provide strong evidence ( $p < 0.001$ ) of an association between duration of pharmacotherapy use and successful cessation. Those who used prescription medication for 5+ weeks or NRT for 5+ weeks had higher cessation rates, 28.8%

1  
2 and 27.8% respectively, than others. Cessation rates for those who used prescription  
3 medication or NRT for less than five weeks varied from 6.2% to 14.5%. Cessation rates for those  
4 who used only behavioral counseling and those who attempted to quit smoking unassisted  
5 were 16.1% and 16.4%, respectively.  
6  
7

8  
9 The results pertaining to the association of other covariates with successful cessation  
10 were very similar in the multivariable regression models for method of quit attempt and  
11 duration of pharmacotherapy use. These results were consistent with bivariate associations  
12 reported above, except for the fact that there was very little evidence for an association of  
13 race/ethnicity and smoking cessation in multivariable analyses.  
14  
15  
16  
17  
18

## 19 DISCUSSION

20  
21 This is the first population-based study to examine the duration of use of prescription  
22 medication as well as NRT for smoking cessation as a predictor of successful smoking cessation.  
23 We found that using pharmacotherapy for five weeks or longer is associated with a remarkably  
24 higher probability of cessation compared to using pharmacotherapy for shorter durations, only  
25 using behavioral counseling or trying to quit unassisted.  
26  
27  
28  
29  
30

31 Our findings are consistent with the results of a study of a hospital-based cessation  
32 program where participants who used NRT for 5 weeks or longer were found to have a higher  
33 cessation rate at 6-month follow-up.[28] However, our findings are not consistent with those of  
34 a population-based study which did not find any evidence that using NRT for more than 6  
35 weeks versus not using NRT at all was associated with smoking cessation.[12] In that study, the  
36 survey response rate was low, the sample size was small and prescription medications were not  
37 examined. These factors could explain the discrepant findings.  
38  
39  
40  
41  
42  
43

44 While we found that smokers who used pharmacotherapy for at least 5 weeks have a far  
45 more favorable outcome than others, only 11% of the sample was in this group and notably  
46 about 70% of the sample did not use any pharmacotherapy for smoking cessation. Previous  
47 research indicates that barriers to the use of these cessation aids include concerns with their  
48 addictiveness, cost and side effects, as well as the belief that a treatment of any kind is not  
49 needed to quit smoking.[29-31]  
50  
51  
52  
53  
54  
55

56 A weakness of the study relates to the fact that smokers forget many quit attempts [7,  
57 32] and they are more prone to recall attempts that used pharmacotherapy than those that did  
58  
59  
60

1  
2 not.[14, 17] Such recall bias can underestimate the success rate of attempts at quitting with the  
3 aid of pharmacotherapy.[17] Another limitation of the study is that because of its observational  
4 nature, our study cannot establish a causal link between the duration of pharmacotherapy use  
5 and successful smoking cessation. While our analyses controlled for several important  
6 predictors of cessation including daily cigarette consumption, age, race, education, occupation,  
7 and income, it is possible that there is residual confounding related to variables such as  
8 depression, anxiety, alcohol use, and financial stress.[33, 34] Such confounding would further  
9 weaken the ability of the study to imply causation. Moreover, there is a possibility of reverse  
10 causation such that relapse would determine duration of pharmacotherapy use rather than vice  
11 versa.[35] Smokers who use Varenicline to quit smoking are asked to completely stop smoking  
12 one week after their quit date.[36] Thus, individuals who use pharmacotherapies and relapse a  
13 short while after a quit attempt may stop using these aids. In such cases, an unsuccessful quit  
14 attempt would cause a short duration of pharmacotherapy use instead of the reverse.  
15  
16  
17  
18  
19  
20  
21  
22  
23  
24  
25

26 A strength of this study was that it used a large nationally representative sample with a  
27 relatively high response rate. This was the first time that questions about the duration of  
28 pharmacotherapy use were included in the TUS-CPS. We know of no other national data on the  
29 general population that provide information on this variable. Many population-based studies of  
30 pharmacotherapies for smoking cessation have found these aids to be ineffective. It is likely  
31 that if these studies were able to account for duration of use, their findings would have been  
32 different. However, data on duration of use is not routinely collected and it would require a  
33 large sample size to provide a reliable estimate of the effect of using these medications for  
34 duration of a few weeks. Nonetheless, it would likely be an important area for further research  
35 to establish the relationship between duration of use of pharmacotherapy and successful  
36 quitting in the general population.  
37  
38  
39  
40  
41  
42  
43  
44  
45  
46

47 Our results strengthen the findings of clinical trials about the efficacy of  
48 pharmacotherapy for smoking cessation and indicate that these aids also be effective in the  
49 general population if they are used for at least five weeks. Smokers who intend to quit should  
50 be encouraged to use pharmacotherapy and adhere to their recommended duration of use.  
51  
52  
53  
54  
55  
56  
57  
58  
59  
60

### CONTRIBUTORSHIP STATEMENT

We assure that all authors included on a paper fulfill the criteria of authorship. All have contributed in the conception and design, analysis and interpretation of data, drafting of the article and revising it critically for important intellectual content, and final approval of the version to be published. In addition we also assure that there is no one else who fulfills the criteria but has not been included as an author. Dr. Mohammad Siahpush was instrumental in conceptualization of research study, data analysis, and writing of the initial draft of the manuscript. Raees Shaikh and Molly McCarthy contributed in the development of study, data analysis, and preparation of the results section. They also helped with writing the manuscript and editing it for final submission. Dr. Asia Sikora helped with literature review, provided inputs for the materials and method section, and contributed to writing and editing the manuscript. Dr. Melissa Tibbits was involved with literature review and data analysis and provided her inputs to the entire manuscript. Dr. Gopal Singh was involved with formulation of research study and helped in the data analysis and contributed in the writing and editing of the final manuscript.

### DETAILS OF FUNDING

This work did not require or receive funding.

### CONFLICT OF INTEREST STATEMENT

All authors have completed the Unified Competing Interest form (available on request from the corresponding author) declare that no support was received from any organization for the submitted work and that there was no financial relationships with any organizations that might have an interest in the submitted work in the previous three years, neither did we have other relationships or activities that could appear to have influenced the submitted work.

### ETHICAL APPROVAL STATEMENT

No ethical approval was required for this work.

### DATA SHARING STATEMENT

No additional data used or available.

### FIGURE LEGENDS

Figure1: Adjusted Cessation Rate by Method of Quit Attempt

Figure2: Adjusted Cessation Rate by Duration of Pharmacotherapy Use



## REFERENCES

- 1 Raupach T, van Schayck C,P. Pharmacotherapy for smoking cessation: current advances and research topics. *CNS Drugs* 2011;**25**(5):371-82.
- 2 Cahill K, Stevens S, Lancaster T. Pharmacological Treatments for Smoking Cessation. *JAMA* 2014;**311**(2):193-4.
- 3 Kasza KA, Hyland AJ, Borland R, et al. Effectiveness of stop-smoking medications: findings from the International Tobacco Control (ITC) Four Country Survey. *Addiction* 2013;**108**(1):193-202.
- 4 West R, Zhou X. Is nicotine replacement therapy for smoking cessation effective in the “real world”? Findings from a prospective multinational cohort study. *Thorax* 2007;**62**(11):998-1002.
- 5 Cummings KM, Fix B, Celestino P, et al. Reach, efficacy, and cost-effectiveness of free nicotine medication giveaway programs. *Journal of Public Health Management and Practice* 2006;**12**(1):37-43.
- 6 Miller N, Frieden TR, Liu SY, et al. Effectiveness of a large-scale distribution programme of free nicotine patches: a prospective evaluation. *Lancet* 2005;**365**:1849-54.
- 7 Shiffman S, Brockwell SE, Pillitteri JL, et al. Use of smoking-cessation treatments in the United States. *American Journal of Preventive Medicine* 2008;**34**(2):102-11.
- 8 Alberg AJ, Patnaik JL, May JW, et al. Nicotine replacement therapy use among a cohort of smokers. *Journal of addictive diseases* 2005;**24**(1):101-13.
- 9 Lee CW, Kahende J. Factors associated with successful smoking cessation in the United States, 2000. *American Journal of Public Health* 2007;**97**(8):1503-9.
- 10 Hagimoto A, Nakamura M, Morita T, et al. Smoking cessation patterns and predictors of quitting smoking among the Japanese general population: a 1-year follow-up study. *Addiction* 2010;**105**(1):164-73.
- 11 Yang J, Hammond D, Driezen P, et al. The use of cessation assistance among smokers from China: Findings from the ITC China Survey. *BMC public health* 2011;**11**(1):75.
- 12 Alpert HR, Connolly GN, Biener L. A prospective cohort study challenging the effectiveness of population-based medical intervention for smoking cessation. *Tobacco control* 2013;**22**(1):32-7.
- 13 Pierce JP, Gilpin EA. Impact of over-the-counter sales on effectiveness of pharmaceutical aids for smoking cessation. *Jama* 2002;**288**(10):1260-4.
- 14 Hughes JR, Peters EN, Naud S. Effectiveness of over-the-counter nicotine replacement therapy: a qualitative review of nonrandomized trials. *Nicotine & tobacco research : official journal of the Society for Research on Nicotine and Tobacco* 2011;**13**(7):512-22.
- 15 Walsh RA. Over-the-counter nicotine replacement therapy: a methodological review of the evidence supporting its effectiveness. *Drug and Alcohol Review* 2008;**27**(5):529-47.



- 1  
2 16 Kotz D, West R. Explaining the social gradient in smoking cessation: it's not in the trying, but in the  
3 succeeding. *Tobacco control* 2009;**18**(1):43-6.  
4  
5  
6 17 Borland R, Partos TR, Cummings KM. Systematic biases in cross-sectional community studies may  
7 underestimate the effectiveness of stop-smoking medications. *Nicotine & Tobacco Research*  
8 2012;**14**(12):1483-7.  
9  
10 18 Shiffman S, Di Marino ME, Sweeney CT. Characteristics of selectors of nicotine replacement therapy.  
11 *Tobacco control* 2005;**14**(5):346-55.  
12  
13  
14 19 Kotz D, Brown J, West R. 'Real-world' effectiveness of smoking cessation treatments: a population  
15 study. *Addiction (Abingdon, England)* 2014;**109**(3):491-9.  
16  
17 20 Raupach T, Brown J, Herbec A, et al. A systematic review of studies assessing the association between  
18 adherence to smoking cessation medication and treatment success. *Addiction* 2014;**109**(1):35-43.  
19  
20  
21 21 Shiffman S, Sweeney CT, Ferguson SG, et al. Relationship between adherence to daily nicotine patch  
22 use and treatment efficacy: Secondary analysis of a 10 week randomized, double-blind, placebo-  
23 controlled clinical trial simulating over-the-counter use in adult smokers. *Clinical therapeutics*  
24 2008;**30**(10):1852-8.  
25  
26  
27 22 Lee JH, Jones PG, Bybee K, et al. A longer course of varenicline therapy improves smoking cessation  
28 rates. *Preventive cardiology* 2008;**11**(4):210-4.  
29  
30  
31 23 U.S. Department of Commerce, Census Bureau. National Cancer Institute and Centers for Disease  
32 Control and Prevention Co-sponsored Tobacco Use Supplement to the Current Population Survey (2010-  
33 2011). 2012;.  
34  
35 24 U.S. Census Bureau. Current population survey: Design and methodology. *Technical Paper TP63RV,*  
36 *Bureau of Labor Statistics and US Census Bureau, Washington DC* October 2006;**2014**(February 10).  
37  
38  
39 25 Gould W. Jackknife estimation. *Stata Technical Bulletin* 1995;**4**(24).  
40  
41  
42 26 The U.S. Census Bureau. Current Population Survey: Imputation of Unreported Data Items.  
43 2014;**2014**(03/18).  
44  
45  
46 27 Williams R. Using the margins command to estimate and interpret adjusted predictions and marginal  
47 effects. *Stata Journal* 2012;**12**(2).  
48  
49  
50 28 Raupach T, Shahab L, Neubert K, et al. Implementing a hospital-based smoking cessation programme:  
51 evidence for a learning effect. *Patient education and counseling* 2008;**70**(2):199-204.  
52  
53  
54 29 Fu SS, Burgess D, van Ryn M, et al. Views on smoking cessation methods in ethnic minority  
55 communities: a qualitative investigation. *Preventive medicine* 2007;**44**(3):235-40.  
56  
57  
58 30 Ryan KK, Garrett-Mayer E, Alberg AJ, et al. Predictors of cessation pharmacotherapy use among black  
59 and non-Hispanic white smokers. *Nicotine & tobacco research : official journal of the Society for*  
60 *Research on Nicotine and Tobacco* 2011;**13**(8):646-52.

1  
2 31 Cokkinides VE, Ward E, Jemal A, et al. Under-use of smoking-cessation treatments: results from the  
3 National Health Interview Survey, 2000. *American Journal of Preventive Medicine* 2005;**28**(1):119-22.

4  
5  
6 32 Berg CJ, An LC, Kirch M, et al. Failure to report attempts to quit smoking. *Addictive Behaviors*  
7 2010;**35**(10):900-4.

8  
9 33 Caponnetto P, Polosa R. Common predictors of smoking cessation in clinical practice. *Respiratory*  
10 *medicine* 2008;**102**(8):1182-92.

11  
12 34 Siahpush M, Carlin JB. Financial stress, smoking cessation and relapse: results from a prospective  
13 study of an Australian national sample. *Addiction* 2006;**110**:121-7.

14  
15  
16 35 Shiffman S. Use of more nicotine lozenges leads to better success in quitting smoking. *Addiction*  
17 2007;**102**(5):809-14.

18  
19  
20 36 Pfizer Inc. Getting started with CHANTIX: Things to Remember. 2014;**2014**(March 2014).

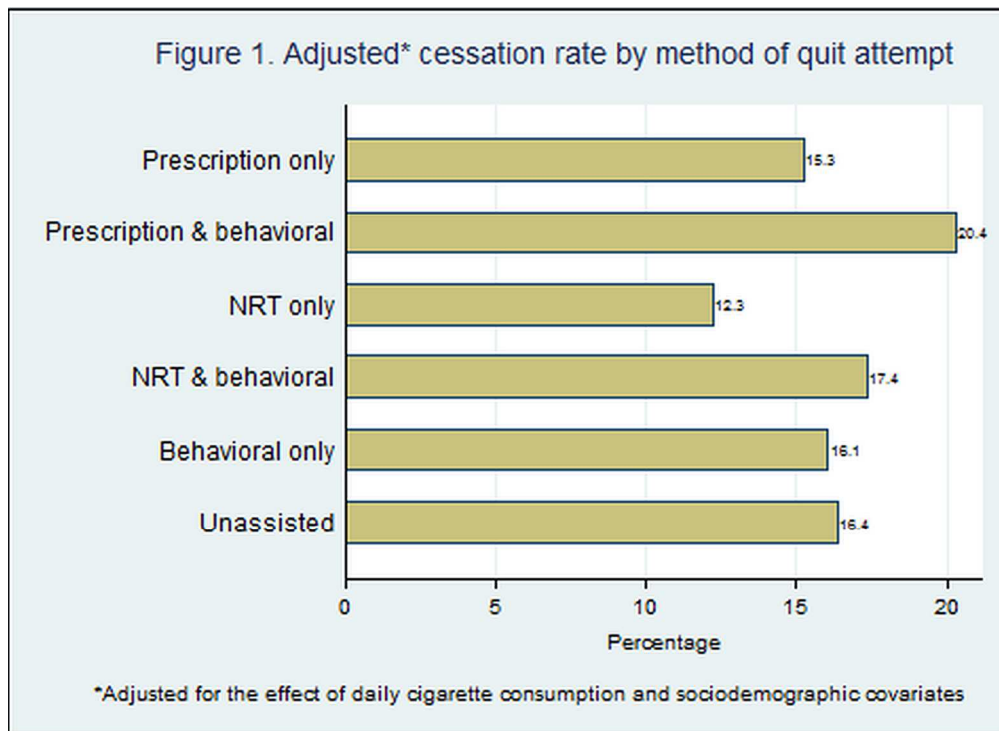

Figure1: Adjusted Cessation Rate by Method of Quit Attempt.

view only

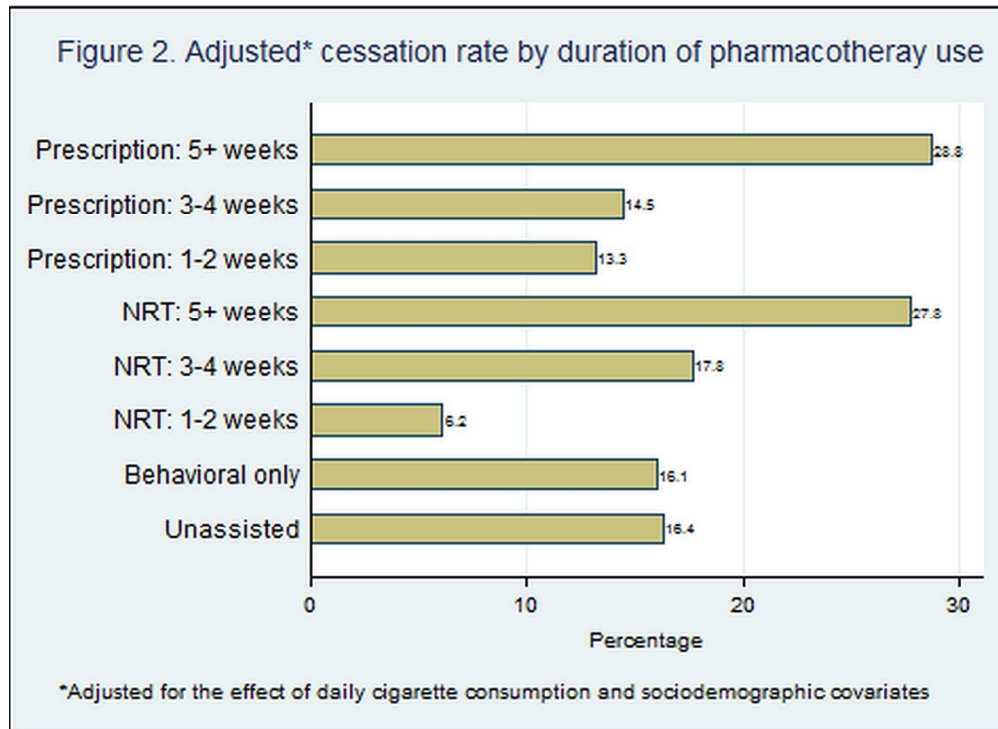

Figure 2: Adjusted Cessation Rate by Duration of Pharmacotherapy Use

## STROBE Statement Checklist

|                               | Checklist |
|-------------------------------|-----------|
| <b>Title and abstract</b>     | Yes       |
| <b>Introduction</b>           |           |
| Background/rationale          | Yes       |
| Objectives/Aims               | Yes       |
| <b>Methods</b>                |           |
| Data sources                  | Yes       |
| Measurement                   | Yes       |
| Statistical methods           | Yes       |
| <b>Results</b>                |           |
| Descriptive data              | Yes       |
| Main results                  | Yes       |
| <b>Discussion</b>             |           |
| Key results                   | Yes       |
| Interpretation                | Yes       |
| Generalizability/Strengths    | Yes       |
| Limitations                   | Yes       |
| <b>Other information</b>      |           |
| Funding                       | Yes       |
| Competing Interest Statement: | Yes       |
| Ethical Approval Statement    | Yes       |
| Contributorship Statement     | Yes       |

# BMJ Open

## Effectiveness of pharmacotherapy for smoking cessation in the general population: Duration of use matters

|                                 |                                                                                                                                                                                                                                                                                                                                                                                                                                                                                                                                                                                                                                                                                                                                                                                                                                                                                  |
|---------------------------------|----------------------------------------------------------------------------------------------------------------------------------------------------------------------------------------------------------------------------------------------------------------------------------------------------------------------------------------------------------------------------------------------------------------------------------------------------------------------------------------------------------------------------------------------------------------------------------------------------------------------------------------------------------------------------------------------------------------------------------------------------------------------------------------------------------------------------------------------------------------------------------|
| Journal:                        | <i>BMJ Open</i>                                                                                                                                                                                                                                                                                                                                                                                                                                                                                                                                                                                                                                                                                                                                                                                                                                                                  |
| Manuscript ID:                  | bmjopen-2014-006229.R1                                                                                                                                                                                                                                                                                                                                                                                                                                                                                                                                                                                                                                                                                                                                                                                                                                                           |
| Article Type:                   | Research                                                                                                                                                                                                                                                                                                                                                                                                                                                                                                                                                                                                                                                                                                                                                                                                                                                                         |
| Date Submitted by the Author:   | 03-Dec-2014                                                                                                                                                                                                                                                                                                                                                                                                                                                                                                                                                                                                                                                                                                                                                                                                                                                                      |
| Complete List of Authors:       | Siahpush, Mohammad; University of Nebraska Medical Center, Department of Health Promotion, Social and Behavioral Health<br>Shaikh, Raees; College of Public Health - University of Nebraska Medical Center, Department of Health Promotion, Social and Behavioral Health<br>McCarthy, Molly; University of Nebraska Medical Center, Department of Health Promotion, Social and Behavioral Health<br>Sikora, Asia; University of Nebraska Medical Center, Department of Health Promotion, Social and Behavioral Health<br>Tibbits, Melissa; University of Nebraska Medical Center, Department of Health Promotion, Social and Be; University of Nebraska Medical Center, Department of Health Promotion, Social and Behavioral Health<br>Singh, Gopal; Health Resources and Services Administration, Maternal and Child Health Bureau, US Department of Health and Human Services |
| <b>Primary Subject Heading</b>: | Smoking and tobacco                                                                                                                                                                                                                                                                                                                                                                                                                                                                                                                                                                                                                                                                                                                                                                                                                                                              |
| Secondary Subject Heading:      | Addiction, Public health                                                                                                                                                                                                                                                                                                                                                                                                                                                                                                                                                                                                                                                                                                                                                                                                                                                         |
| Keywords:                       | PREVENTIVE MEDICINE, PUBLIC HEALTH, SOCIAL MEDICINE                                                                                                                                                                                                                                                                                                                                                                                                                                                                                                                                                                                                                                                                                                                                                                                                                              |
|                                 |                                                                                                                                                                                                                                                                                                                                                                                                                                                                                                                                                                                                                                                                                                                                                                                                                                                                                  |

SCHOLARONE™  
Manuscripts

**Association between duration of use and success of pharmacotherapy for smoking cessation:  
Findings from a national survey**

Mohammad Siahpush, PhD

Department of Health Promotion, Social and Behavioral Health  
College of Public Health | University of Nebraska Medical Center  
984365 Nebraska Medical Center | Omaha, NE 68198-4365 | USA

Corresponding author:

Raees A. Shaikh, MPH

Department of Health Promotion, Social and Behavioral Health  
College of Public Health | University of Nebraska Medical Center  
984365 Nebraska Medical Center | Omaha, NE 68198-4365 | USA  
Email: raees.shaikh@unmc.edu | Tel: 402-559-1936 | Fax: 402-559-3773

Molly McCarthy, MPH

Department of Health Promotion, Social and Behavioral Health  
College of Public Health | University of Nebraska Medical Center  
984365 Nebraska Medical Center | Omaha, NE 68198-4365 | USA

Asia Sikora Kessler, PhD

Department of Health Promotion, Social and Behavioral Health  
College of Public Health | University of Nebraska Medical Center  
984365 Nebraska Medical Center | Omaha, NE 68198-4365 | USA

Melissa Tibbits, PhD

Department of Health Promotion, Social and Behavioral Health  
College of Public Health | University of Nebraska Medical Center  
984365 Nebraska Medical Center | Omaha, NE 68198-4365 | USA

Gopal K. Singh, Ph.D., M.S., M.Sc.

U.S. Department of Health & Human Services  
5600 Fishers lane, Room 18-41 | Rockville, MD 20857 | USA

**Word Count: 2496**

**Key Words:** Pharmacotherapy for Smoking Cessation, Duration of Pharmacotherapy Use, Smoking Cessation, Assisted Cessation

## ABSTRACT

**Objective:** To investigate the association of the duration of use of prescription medications and nicotine replacement therapy (NRT) with smoking cessation using a national sample of the general population in the United States, controlling for nicotine dependence and sociodemographic variables.

**Setting:** United States

**Participants:** We used data from the 2010-2011 Tobacco Use Supplement to the US Current Population Survey. We limited the analysis to current daily smokers who made a quit attempt in the past year and former smokers who were a daily smoker one year prior to the survey (n = 8 263). Respondents were asked about duration of use of prescription medication (varenicline, bupropion, other) and NRT (nicotine patch, gum/lozenges, nasal spray, and inhaler) for smoking cessation.

**Primary Outcome Measure:** Successful Smoking Cessation

**Results:** After adjusting for daily cigarette consumption and sociodemographic covariates, we found evidence for an association ( $p < 0.001$ ) between duration of pharmacotherapy use and smoking cessation. Adjusted cessation rates for those who used prescription medication or NRT for 5+ weeks were 28.8% and 27.8%, respectively. Adjusted cessation rates for those who used prescription medication or NRT for less than five weeks varied from 6.2% to 14.5%. Adjusted cessation rates for those who used only behavioral counseling and those who attempted to quit smoking unassisted were 16.1% and 16.4%, respectively.

**Conclusion:** Pharmacotherapies for smoking cessation can be effective in the general population if used for at least five weeks. Results suggest that encouraging smokers who intend to quit to use pharmacotherapy and to adhere to treatment duration can help improve chances of a successful cessation.



## ARTICLE SUMMARY

**Strengths and limitations of the study:**

- This was the first population-based study to examine the association between the duration of use of prescription medication as well as NRT for smoking cessation and successful smoking cessation, controlling for nicotine dependence and sociodemographic variables.
- A strength of this study was that it used a large nationally representative sample with a relatively high response rate.
- Our results strengthen the findings of clinical trials about the efficacy of pharmacotherapy for smoking cessation and indicate that these aids might also be successful in the general population if they are used for at least five weeks.
- A strong possibility of reverse causation such that relapse would determine duration of pharmacotherapy use rather than vice versa, was a major limitation of this study. Recall bias, especially related to the smokers previous quit attempts and the observational nature of the study precluding the establishment of a causal link were between the duration of pharmacotherapy use and successful smoking cessation, were the other limitations.

## INTRODUCTION

1  
2  
3  
4  
5  
6  
7  
8  
9  
10  
11  
12  
13  
14  
15  
16  
17  
18  
19  
20  
21  
22  
23  
24  
25  
26  
27  
28  
29  
30  
31  
32  
33  
34  
35  
Clinical trials provide strong evidence that pharmacotherapy for smoking cessation including various forms of nicotine replacement therapies (NRT), bupropion, or varenicline greatly increase the chances of a successful smoking cessation attempt.[1, 2] However, observational population-based studies have shown mixed results. While some have shown that pharmacotherapy increases smoking cessation rates,[3-6] others have concluded the opposite.[7-11] Yet, other population-based studies have shown no difference in cessation rates between those who use and those who do not use pharmacotherapy.[12, 13] The population-based reports that have found no favorable effect of pharmacotherapy have been criticized for not controlling for nicotine dependence,[14-16] which is a predictor of abstinence and is usually higher among smokers who choose to use pharmacotherapy for smoking cessation.[4, 14, 17, 18] Some of the analyses that have controlled for nicotine dependence have found a favorable effect of pharmacotherapy on smoking cessation[3, 4, 19] but others have not.[7]

36  
37  
38  
39  
40  
41  
42  
43  
44  
45  
46  
47  
48  
49  
50  
51  
52  
An additional confounder that rarely is taken into account in population-based studies is duration of use of pharmacotherapy, which has been found to be associated with treatment success in clinical trials.[20-22] We know of one population-based study which examined the association of duration of use of pharmacotherapy with smoking cessation and found no association.[12] This study was conducted in the US where NRT can be purchased over the counter and medications such as bupropion and varenicline can only be obtained as prescription drugs.

53  
54  
55  
56  
57  
58  
59  
60  
While clinical trials have high internal validity and can provide evidence for the efficacy of pharmacotherapy, observational population-based studies can address effectiveness of these

1 therapies under conditions that they are intended to be used.[14] Furthermore, while clinical  
2  
3 trials provide confidence in causal associations, population-based studies are strong in  
4  
5 representativeness and external validity. Thus, both are needed to advance the science of  
6  
7 smoking cessation.[19]  
8  
9

10  
11 There is no literature on population-based studies that examine the association of  
12  
13 duration of NRT and prescription medication use with smoking cessation. Our aim was to use a  
14  
15 large representative sample of the general population in the United States and investigate the  
16  
17 association of the duration of use of prescription medications and NRT with smoking cessation,  
18  
19 controlling for nicotine dependence and sociodemographic variables.  
20  
21  
22

## 23 METHODS

### 24 Data

25  
26 We used data from the 2010-2011 Tobacco Use Supplement to the Current Population  
27  
28 Survey (TUS-CPS), sponsored by the National Cancer Institute and administered by the US  
29  
30 Census Bureau in May 2010, August 2010, and January 2011.[23] The TUS-CPS is administered  
31  
32 as a part of the CPS, which is a monthly national survey of representative households by the US  
33  
34 Census Bureau and the Bureau of Labor Statistics.[24] The TUS-CPS utilizes a multistage  
35  
36 probability sampling of individuals 15 years and older, from a sample of approximately 56,000  
37  
38 housing units, in turn selected from 792 primary sampling units. The average response rate for  
39  
40 CPS for the 3 months of surveys used in this study was 93%, whereas for the TUS it was 63%.  
41  
42  
43  
44  
45  
46  
47

### 48 Measurement

#### 49 *Successful smoking cessation:*

50  
51  
52 Individuals who reported to have smoked at least 100 cigarettes in their entire life but  
53  
54 were not smoking at all at the time of the interview and were a daily smoker one year prior to  
55  
56  
57  
58  
59  
60

1 the interview (“Around this time 12 months ago were you smoking everyday ...?”) were  
2  
3 considered to have successfully quit smoking (n = 1 769). Those who reported to have quit  
4  
5 within the last four weeks were excluded from the analysis (n = 322). Individuals who reported  
6  
7 within the last four weeks were excluded from the analysis (n = 322). Individuals who reported  
8  
9 to have smoked at least 100 cigarettes in their entire life, were smoking every day at the time  
10  
11 of the interview and had made a quit attempt in the past year were considered to have failed in  
12  
13 their quit attempt (n = 7 304). Individuals who reported to have used both prescription  
14  
15 medication and NRT for smoking cessation were excluded from the analysis (n = 488) because  
16  
17 after subdividing this group by categories of duration of use for prescription medication and  
18  
19 NRT, some of the subgroup sample sizes were extremely small. The total sample size for the  
20  
21 study was 8 263 respondents, consisting of 1 379 who successfully quit smoking and 6 884  
22  
23 whose quit attempt was not successful.  
24  
25  
26  
27

28 *Assisted quit attempt and duration of pharmacotherapy use:*  
29

30  
31 Both daily and former smokers were asked in three separate questions to indicate  
32  
33 whether, in their last quit attempt in the past year, they used a prescription pill called (a)  
34  
35 Chantix or varenicline, (b) zyban, bupropion, or wellbutrin, or (b) other prescription pills. They  
36  
37 were also asked in three separate questions to indicate whether, in their last quit attempt in  
38  
39 the past year, they used (a) a nicotine patch, (b) nicotine gum or nicotine lozenge, or (c)  
40  
41 nicotine nasal spray or nicotine inhaler. They were also asked to indicate how many days,  
42  
43 weeks or months they used these prescription and/or NRT medications. Furthermore, both  
44  
45 daily and former smokers were asked three separate questions about use of behavioral  
46  
47 counseling in their last quit attempt in the past year. They were asked if they used a (a)  
48  
49 telephone helpline or quitline, (b) one-on-one counseling or (c) stop smoking clinic, class or  
50  
51  
52  
53  
54  
55  
56  
57  
58  
59  
60

1 support group. Based on the questions about use of prescription medication, NRT and  
2  
3 behavioral counseling, we created the following two categorical variables:  
4

5  
6 Method of quit attempt  
7

- 8 • Prescription medication only
- 9
- 10 • Prescription medication and behavioral counseling
- 11
- 12 • NRT only
- 13
- 14 • NRT and behavioral counseling
- 15
- 16 • Behavioral counseling only
- 17
- 18 • Unassisted
- 19
- 20
- 21
- 22
- 23

24 Duration of use of pharmacotherapy  
25

- 26 • Prescription medication: 5+ weeks
- 27
- 28 • Prescription medication: 3-4 weeks
- 29
- 30 • Prescription medication: 1-2 weeks<sup>1</sup>
- 31
- 32 • NRT: 5+ weeks
- 33
- 34 • NRT: 3-4 weeks
- 35
- 36 • NRT: 1-2 weeks
- 37
- 38 • Behavioral counseling only
- 39
- 40 • Unassisted
- 41
- 42
- 43
- 44
- 45
- 46

47 We categorized duration of use of pharmacotherapy based on a systematic review of  
48 studies assessing adherence to smoking cessation medication.[20] In categorizing duration of  
49 use, we made no distinction between whether or not the medication was combined with  
50 behavioral counseling as this distinction was inconsequential in the analysis.  
51  
52  
53  
54  
55

56  
57 **Statistical analysis**  
58  
59  
60

1 We used multivariable logistic regression models to compute adjusted odds ratios for  
2  
3 the association of the method of quit attempt and duration of use of pharmacotherapy with  
4  
5 successful smoking cessation. Sampling weights were taken into account in the computation of  
6  
7 parameter estimates. We computed  $p$ -values using the jackknife, which is an unbiased  
8  
9 estimator for a statistic and a data-dependent method to calculate standard errors.[25] All  
10  
11 models controlled for daily cigarette consumption (current daily consumption among daily  
12  
13 smokers, and daily consumption 12 months ago among former smokers), age, race/ethnicity,  
14  
15 education, occupation, and family income. In order to account for the missing income data, CPS  
16  
17 uses one of the three imputation methods, relational imputation, longitudinal edits, or hot deck  
18  
19 allocation. Details of these methods are described elsewhere.[26] In multivariable logistic  
20  
21 regression models, we omitted observations that had a missing value for any of the covariates.  
22  
23 This constituted 1.7% of the full sample in the analysis pertaining to the method of quit attempt  
24  
25 (n = 142) and 6.3% of the full sample in the analysis pertaining to duration of pharmacotherapy  
26  
27 use (n = 491). We used the logistic regression results to compute adjusted cessation rates by  
28  
29 method of quit attempt and duration of use of pharmacotherapy. These adjusted rates were  
30  
31 computed by fixing covariates at their means in the fitted models.[27]  
32  
33  
34  
35  
36  
37  
38  
39  
40

## 41 RESULTS

### 42 Sample characteristics and bivariate associations

43  
44  
45  
46  
47  
48  
49  
50  
51  
52  
53  
54  
55  
56  
57  
58  
59  
60

**Table 1. Weighted sample characteristics and unadjusted smoking cessation rates across categories of each covariate**

| Variable                             | % in sample | % quit | p- value |
|--------------------------------------|-------------|--------|----------|
| Method of quit attempt               |             |        | 0.074    |
| Prescription only                    | 10.01       | 18.54  |          |
| Prescription plus behavioral support | 1.14        | 23.8   |          |
| NRT only                             | 18.26       | 14.32  |          |
| NRT plus behavioral support          | 2.54        | 18.98  |          |
| Behavioral only                      | 1.36        | 18.59  |          |
| Unassisted                           | 66.68       | 17.16  |          |
| Duration of pharmacotherapy use      |             |        | <0.001   |
| Prescription: 5+ weeks               | 4.9         | 34.38  |          |
| Prescription: 3-4 weeks              | 1.43        | 16.82  |          |
| Prescription: 1-2 weeks              | 1.89        | 15.28  |          |
| NRT: 5+ weeks                        | 6.04        | 30.65  |          |
| NRT: 3-4 weeks                       | 1.48        | 19.9   |          |
| NRT: 1-2 weeks                       | 13.48       | 7.36   |          |
| Behavioral only                      | 1.42        | 18.59  |          |
| Unassisted                           | 69.36       | 17.16  |          |
| Cigarettes per day                   |             |        | <0.001   |
| 0-9                                  | 24.48       | 15.08  |          |
| 10-14                                | 30.04       | 12.58  |          |
| 15-19                                | 10.31       | 12.58  |          |
| 20-29                                | 29.23       | 21.83  |          |
| 30+                                  | 5.93        | 29.59  |          |
| Sex                                  |             |        | 0.975    |
| Female                               | 50.12       | 16.99  |          |
| Male                                 | 49.88       | 17.02  |          |
| Age                                  |             |        | < 0.001  |
| 18-24                                | 11.79       | 15.32  |          |
| 25-39                                | 33.08       | 18.17  |          |
| 40-54                                | 32.33       | 14.49  |          |
| 55+                                  | 22.8        | 19.77  |          |
| Race/Ethnicity                       |             |        | 0.003    |
| Non-Hispanic White                   | 76.17       | 17.99  |          |
| Non-Hispanic Black                   | 11.34       | 12.98  |          |
| Hispanic                             | 7.39        | 15.73  |          |
| Other                                | 5.09        | 13.15  |          |
| Education                            |             |        | <0.001   |
| Less than high school                | 15.25       | 13.15  |          |
| High school diploma                  | 73.34       | 16.74  |          |
| Bachelor's degree                    | 11.41       | 23.91  |          |
| Occupation                           |             |        | <0.001   |
| Professional                         | 14.33       | 20.99  |          |
| Service                              | 12.31       | 13.96  |          |
| Sales                                | 14.5        | 18.45  |          |
| Farming/construction/production      | 17.28       | 13.08  |          |
| Unemployed                           | 12.01       | 13.81  |          |
| Not in labor force                   | 29.57       | 19.24  |          |
| Family income                        |             |        | <0.001   |
| <\$25,000                            | 36.27       | 13.94  |          |
| \$25,000-\$49,000                    | 31.65       | 17.21  |          |
| \$50,000-\$99,000                    | 23.86       | 19.63  |          |
| \$100,000+                           | 8.23        | 22.17  |          |
| Full sample                          |             | 17.01  |          |

Note: Sample size for each covariate varies from 7 820 to 8 263 depending on the number of missing values for that covariate. P-values are based on chi-square tests.

1 Weighted sample characteristics are shown in Table 1. About 66.7% of the sample  
2 reported to have made an unassisted quit attempt; 10% used only prescription medication;  
3 1.1% used prescription medication plus behavioral counseling; 18.2% used only NRT; 2.5% used  
4 NRT plus behavioral therapy; and 1.3% used only behavioral counseling. When broken down by  
5 duration of use, while most of those who used prescription medication did so for five or more  
6 weeks, the great majority of those who used NRT did so for 2 weeks or less. The reported  
7 number of cigarettes smoked per day was 14 or less for about 54.5% of the sample. Age was  
8 distributed with 11.8% of the sample under 25 years of age, 33% between 25-39 years, 32.3%  
9 between 40-54 years, and 22.8% 55 years or older. The sample was 76% non-Hispanic white,  
10 11.3% non-Hispanic Black, 7.4% Hispanic, and 5% of other race/ethnicity. About 15.2% of the  
11 sample did not have a high school diploma, 73.3% had high school diploma, and 11.4% had at  
12 least a bachelor's degree. The distribution of family income was skewed such that over a third  
13 of the sample had an income of less than \$25 000 and less than a tenth of the sample had an  
14 income of \$100 000 or greater.

15  
16  
17  
18  
19  
20  
21  
22  
23  
24  
25  
26  
27 Table 1 also provides smoking cessation rates across categories of each covariate,  
28 indicating bivariate (unadjusted) associations between the covariates and quitting. Cessation  
29 rate was 17% in the whole sample. There was very little evidence that method of quit attempt  
30 was associated with cessation rate ( $p < 0.074$ ). However, the duration of pharmacotherapy use  
31 ( $p < 0.001$ ), number of cigarettes smoked per day ( $p < 0.001$ ), age ( $p < 0.001$ ), and  
32 race/ethnicity ( $p = 0.003$ ) were all associated with quitting. Higher socioeconomic status as  
33 measured by education, occupation, and income was associated with a higher cessation rate ( $p$   
34  $< 0.001$  for all three indicators of socioeconomic status). Sex had no association with cessation.  
35  
36  
37  
38  
39  
40  
41  
42  
43

#### 44 **Adjusted results from multivariable logistic regression models**

45  
46 Table 2 provides adjusted odds ratios for the association of method of quit attempt with the  
47 probability of smoking cessation. Figure 1 shows the adjusted cessation rates for various  
48 quitting methods. Unlike the unadjusted results in Table 1 which provided very little evidence  
49 of an association between quitting method and successful cessation, the adjusted results  
50  
51  
52  
53  
54  
55  
56  
57  
58  
59  
60



**Table 2. Adjusted<sup>a</sup> odds ratios and 95% confidence intervals (CI) for the association of method of quit attempt and duration of pharmacotherapy use with the probability of successful smoking cessation**

|                                                    | OR (95% CI)      | p-value |
|----------------------------------------------------|------------------|---------|
| <b>Method of quit attempt (n = 8 121)</b>          |                  |         |
| Prescription only                                  | 1.00             |         |
| Prescription plus behavioral support               | 1.42 (0.76-2.66) | 0.277   |
| NRT only                                           | 0.78 (0.59-1.02) | 0.072   |
| NRT plus behavioral support                        | 1.17 (0.73-1.86) | 0.513   |
| Behavioral only                                    | 1.06 (0.57-1.97) | 0.844   |
| Unassisted                                         | 1.09 (0.87-1.37) | 0.464   |
| <b>Duration of pharmacotherapy use (n = 7 772)</b> |                  |         |
| Prescription: 5+ weeks                             | 1.00             |         |
| Prescription: 3-4 weeks                            | 0.42 (0.21-0.84) | 0.014   |
| Prescription: 1-2 weeks                            | 0.38 (0.22-0.66) | 0.001   |
| NRT: 5+ weeks                                      | 0.95 (0.67-1.36) | 0.786   |
| NRT: 3-4 weeks                                     | 0.53 (0.29-0.97) | 0.040   |
| NRT: 1-2 weeks                                     | 0.16 (0.11-0.24) | <0.001  |
| Behavioral only                                    | 0.47 (0.25-0.90) | 0.022   |
| Unassisted                                         | 0.48 (0.37-0.64) | <0.001  |

<sup>a</sup> Adjusted for the effect of number of cigarettes smoked per day, sex, age, race/ethnicity, education, occupation, and family income.

Figure 1 here.....

revealed some evidence of an association ( $p = 0.025$ ). The highest cessation rate was among those who used prescription medication and behavioral counseling (20.4%) followed by those who used NRT and behavioral counseling (17.4%), attempted to quit unassisted (16.4%), used behavioral counseling only (16.1%), and those who used prescription medication only (15.3%). The lowest cessation rate was among those who only used NRT as a quitting method (12.3%).

Figure 2 here.....

Table 2 also provides adjusted odds ratios for the association of duration of pharmacotherapy use with the probability of smoking cessation. Figure 2 shows the adjusted cessation rates for various durations of pharmacotherapy use. Consistent with the unadjusted results in Table 1, the adjusted results in Table 2 also provide evidence ( $p < 0.001$ ) of an association between duration of pharmacotherapy use and successful cessation. As shown in Figure 2, cessation rates were highest among those who used prescription medication for 5+ weeks (28.8%) and those who used NRT for 5+ weeks (27.8%). Cessation rates for those who used prescription medication or NRT for less than five weeks varied from 6.2% to 14.5%.

1 Cessation rates for those who used only behavioral counseling and those who attempted to  
2 quit smoking unassisted were 16.1% and 16.4%, respectively.  
3

4 The results pertaining to the association of other covariates with successful cessation  
5 were very similar in the multivariable regression models for method of quit attempt and  
6 duration of pharmacotherapy use. These results were consistent with bivariate associations  
7 reported above, except for the fact that there was very little evidence for an association of  
8 race/ethnicity and smoking cessation in multivariable analyses.  
9  
10  
11  
12  
13

## 14 DISCUSSION

15 This is the first population-based study to examine the association of successful smoking  
16 cessation and duration of use of prescription medication as well as NRT for smoking cessation.  
17 We found that using pharmacotherapy for five weeks or longer is associated with a higher  
18 probability of cessation compared to using pharmacotherapy for shorter durations, only using  
19 behavioral counseling or trying to quit unassisted.  
20  
21  
22  
23  
24  
25  
26  
27

28 Our findings are consistent with the results of a study of a hospital-based cessation  
29 program where participants who used NRT for 5 weeks or longer were found to have a higher  
30 cessation rate at 6-month follow-up.[28] However, our findings are not consistent with those of  
31 a population-based study which did not find any evidence that using NRT for more than 6  
32 weeks versus not using NRT at all was associated with smoking cessation.[12] In that study, the  
33 survey response rate was low, the sample size was small and prescription medications were not  
34 examined. These factors could explain the discrepant findings.  
35  
36  
37  
38  
39  
40

41 While we found that smokers who used pharmacotherapy for at least 5 weeks have a far  
42 more favorable outcome than others, only 11% of the sample was in this group and notably  
43 about 70% of the sample did not use any pharmacotherapy for smoking cessation. Previous  
44 research indicates that barriers to the use of these cessation aids include concerns with their  
45 addictiveness, cost and side effects, as well as the belief that a treatment of any kind is not  
46 needed to quit smoking.[29-31]  
47  
48  
49  
50  
51

52 A major limitation of the study is that there is a strong possibility of reverse causation  
53 such that relapse would determine duration of pharmacotherapy use rather than vice  
54 versa.[35] Smokers who use varenicline to quit smoking are asked to completely stop smoking  
55 one week after their quit date.[36] Thus, individuals who use pharmacotherapies and relapse a  
56  
57  
58  
59  
60

1 short while after a quit attempt may stop using these aids. In such cases, an unsuccessful quit  
2 attempt would cause a short duration of pharmacotherapy use instead of the reverse.  
3  
4 Furthermore, because of its observational nature, our study cannot establish a causal link  
5 between the duration of pharmacotherapy use and successful smoking cessation. While our  
6 analyses controlled for several important predictors of cessation including daily cigarette  
7 consumption, age, race, education, occupation, and income, it is possible that there might be  
8 residual confounding related to variables such as depression, anxiety, alcohol use, and financial  
9 stress.[33, 34] Such confounding would further weaken the ability of the study to imply  
10 causation.  
11  
12

13  
14  
15  
16  
17  
18 Another weakness of the study relates to the fact that smokers forget many quit  
19 attempts [7, 32] and they are more prone to recall attempts that used pharmacotherapy than  
20 those that did not.[14, 17] Such recall bias can underestimate the success rate of attempts at  
21 quitting with the aid of pharmacotherapy.[17]  
22  
23

24  
25 A strength of this study was that it used a large nationally representative sample with a  
26 relatively high response rate. This was the first time that questions about the duration of  
27 pharmacotherapy use were included in the TUS-CPS. We know of no other national data on the  
28 general population that provide information on this variable. Many population-based studies of  
29 pharmacotherapies for smoking cessation have found these aids to be ineffective. It is likely  
30 that if these studies were able to account for duration of use, their findings would have been  
31 different. However, data on duration of use is not routinely collected and it would require a  
32 large sample size to provide a reliable estimate of the effect of using these medications for  
33 duration of a few weeks. Nonetheless, it would likely be an important area for further research  
34 to establish the relationship between duration of use of pharmacotherapy and successful  
35 quitting in the general population.  
36  
37  
38  
39  
40  
41  
42  
43  
44  
45

46 Our results strengthen the findings of clinical trials about the efficacy of  
47 pharmacotherapy for smoking cessation and indicate that these aids might also be successful in  
48 the general population if they are used for at least five weeks.  
49  
50  
51  
52  
53  
54  
55  
56  
57  
58  
59  
60

### CONTRIBUTORSHIP STATEMENT

We assure that all authors included on a paper fulfill the criteria of authorship. All have contributed in the conception and design, analysis and interpretation of data, drafting of the article and revising it critically for important intellectual content, and final approval of the version to be published. In addition we also assure that there is no one else who fulfills the criteria but has not been included as an author. Dr. Mohammad Siahpush was instrumental in conceptualization of research study, data analysis, and writing of the initial draft of the manuscript. Raees Shaikh and Molly McCarthy contributed in the development of study, data analysis, and preparation of the results section. They also helped with writing the manuscript and editing it for final submission. Dr. Asia Sikora helped with literature review, provided inputs for the materials and method section, and contributed to writing and editing the manuscript. Dr. Melissa Tibbits was involved with literature review and data analysis and provided her inputs to the entire manuscript. Dr. Gopal Singh was involved with formulation of research study and helped in the data analysis and contributed in the writing and editing of the final manuscript.

### DETAILS OF FUNDING

This work did not require or receive funding.

### CONFLICT OF INTEREST STATEMENT

All authors have completed the Unified Competing Interest form (available on request from the corresponding author) declare that no support was received from any organization for the submitted work and that there was no financial relationships with any organizations that might have an interest in the submitted work in the previous three years, neither did we have other relationships or activities that could appear to have influenced the submitted work.

### ETHICAL APPROVAL STATEMENT

No ethical approval was required for this work.

### DATA SHARING STATEMENT

No additional data used or available.

### FIGURE LEGENDS

Figure1: Adjusted Cessation Rate by Method of Quit Attempt

Figure2: Adjusted Cessation Rate by Duration of Pharmacotherapy Use

## REFERENCES

- 1 Raupach T, van Schayck C,P. Pharmacotherapy for smoking cessation: current advances and research topics. *CNS Drugs* 2011;**25**(5):371-82.
- 2 Cahill K, Stevens S, Lancaster T. Pharmacological Treatments for Smoking Cessation. *JAMA* 2014;**311**(2):193-4.
- 3 Kasza KA, Hyland AJ, Borland R, et al. Effectiveness of stop-smoking medications: findings from the International Tobacco Control (ITC) Four Country Survey. *Addiction* 2013;**108**(1):193-202.
- 4 West R, Zhou X. Is nicotine replacement therapy for smoking cessation effective in the “real world”? Findings from a prospective multinational cohort study. *Thorax* 2007;**62**(11):998-1002.
- 5 Cummings KM, Fix B, Celestino P, et al. Reach, efficacy, and cost-effectiveness of free nicotine medication giveaway programs. *Journal of Public Health Management and Practice* 2006;**12**(1):37-43.
- 6 Miller N, Frieden TR, Liu SY, et al. Effectiveness of a large-scale distribution programme of free nicotine patches: a prospective evaluation. *Lancet* 2005;**365**:1849-54.
- 7 Shiffman S, Brockwell SE, Pillitteri JL, et al. Use of smoking-cessation treatments in the United States. *American Journal of Preventive Medicine* 2008;**34**(2):102-11.
- 8 Alberg AJ, Patnaik JL, May JW, et al. Nicotine replacement therapy use among a cohort of smokers. *Journal of addictive diseases* 2005;**24**(1):101-13.
- 9 Lee CW, Kahende J. Factors associated with successful smoking cessation in the United States, 2000. *American Journal of Public Health* 2007;**97**(8):1503-9.
- 10 Hagimoto A, Nakamura M, Morita T, et al. Smoking cessation patterns and predictors of quitting smoking among the Japanese general population: a 1-year follow-up study. *Addiction* 2010;**105**(1):164-73.
- 11 Yang J, Hammond D, Driezen P, et al. The use of cessation assistance among smokers from China: Findings from the ITC China Survey. *BMC public health* 2011;**11**(1):75.
- 12 Alpert HR, Connolly GN, Biener L. A prospective cohort study challenging the effectiveness of population-based medical intervention for smoking cessation. *Tobacco control* 2013;**22**(1):32-7.
- 13 Pierce JP, Gilpin EA. Impact of over-the-counter sales on effectiveness of pharmaceutical aids for smoking cessation. *Jama* 2002;**288**(10):1260-4.
- 14 Hughes JR, Peters EN, Naud S. Effectiveness of over-the-counter nicotine replacement therapy: a qualitative review of nonrandomized trials. *Nicotine & tobacco research : official journal of the Society for Research on Nicotine and Tobacco* 2011;**13**(7):512-22.
- 15 Walsh RA. Over-the-counter nicotine replacement therapy: a methodological review of the evidence supporting its effectiveness. *Drug and Alcohol Review* 2008;**27**(5):529-47.

- 1 16 Kotz D, West R. Explaining the social gradient in smoking cessation: it's not in the trying, but in the  
2 succeeding. *Tobacco control* 2009;**18**(1):43-6.
- 3  
4 17 Borland R, Partos TR, Cummings KM. Systematic biases in cross-sectional community studies may  
5 underestimate the effectiveness of stop-smoking medications. *Nicotine & Tobacco Research*  
6 2012;**14**(12):1483-7.
- 7  
8 18 Shiffman S, Di Marino ME, Sweeney CT. Characteristics of selectors of nicotine replacement therapy.  
9 *Tobacco control* 2005;**14**(5):346-55.
- 10  
11 19 Kotz D, Brown J, West R. 'Real-world' effectiveness of smoking cessation treatments: a population  
12 study. *Addiction (Abingdon, England)* 2014;**109**(3):491-9.
- 13  
14 20 Raupach T, Brown J, Herbec A, et al. A systematic review of studies assessing the association between  
15 adherence to smoking cessation medication and treatment success. *Addiction* 2014;**109**(1):35-43.
- 16  
17 21 Shiffman S, Sweeney CT, Ferguson SG, et al. Relationship between adherence to daily nicotine patch  
18 use and treatment efficacy: Secondary analysis of a 10 week randomized, double-blind, placebo-  
19 controlled clinical trial simulating over-the-counter use in adult smokers. *Clinical therapeutics*  
20 2008;**30**(10):1852-8.
- 21  
22 22 Lee JH, Jones PG, Bybee K, et al. A longer course of varenicline therapy improves smoking cessation  
23 rates. *Preventive cardiology* 2008;**11**(4):210-4.
- 24  
25 23 U.S. Department of Commerce, Census Bureau. National Cancer Institute and Centers for Disease  
26 Control and Prevention Co-sponsored Tobacco Use Supplement to the Current Population Survey (2010-  
27 2011). 2012;.
- 28  
29 24 U.S. Census Bureau. Current population survey: Design and methodology. *Technical Paper TP63RV,*  
30 *Bureau of Labor Statistics and US Census Bureau, Washington DC* October 2006;**2014**(February 10).
- 31  
32 25 Gould W. Jackknife estimation. *Stata Technical Bulletin* 1995;**4**(24).
- 33  
34 26 The U.S. Census Bureau. Current Population Survey: Imputation of Unreported Data Items.  
35 2014;**2014**(03/18).
- 36  
37 27 Williams R. Using the margins command to estimate and interpret adjusted predictions and marginal  
38 effects. *Stata Journal* 2012;**12**(2).
- 39  
40 28 Raupach T, Shahab L, Neubert K, et al. Implementing a hospital-based smoking cessation programme:  
41 evidence for a learning effect. *Patient education and counseling* 2008;**70**(2):199-204.
- 42  
43 29 Fu SS, Burgess D, van Ryn M, et al. Views on smoking cessation methods in ethnic minority  
44 communities: a qualitative investigation. *Preventive medicine* 2007;**44**(3):235-40.
- 45  
46 30 Ryan KK, Garrett-Mayer E, Alberg AJ, et al. Predictors of cessation pharmacotherapy use among black  
47 and non-Hispanic white smokers. *Nicotine & tobacco research : official journal of the Society for*  
48 *Research on Nicotine and Tobacco* 2011;**13**(8):646-52.
- 49  
50  
51  
52  
53  
54  
55  
56  
57  
58  
59  
60

- 1 31 Cokkinides VE, Ward E, Jemal A, et al. Under-use of smoking-cessation treatments: results from the  
2 National Health Interview Survey, 2000. *American Journal of Preventive Medicine* 2005;**28**(1):119-22.  
3
- 4 32 Berg CJ, An LC, Kirch M, et al. Failure to report attempts to quit smoking. *Addictive Behaviors*  
5 2010;**35**(10):900-4.  
6
- 7 33 Caponnetto P, Polosa R. Common predictors of smoking cessation in clinical practice. *Respiratory*  
8 *medicine* 2008;**102**(8):1182-92.  
9
- 10 34 Siahpush M, Carlin JB. Financial stress, smoking cessation and relapse: results from a prospective  
11 study of an Australian national sample. *Addiction* 2006;**110**:121-7.  
12
- 13 35 Shiffman S. Use of more nicotine lozenges leads to better success in quitting smoking. *Addiction*  
14 2007;**102**(5):809-14.  
15
- 16 36 Pfizer Inc. Getting started with CHANTIX: Things to Remember. 2014;**2014**(March 2014).  
17  
18  
19  
20  
21  
22  
23  
24  
25  
26  
27  
28  
29  
30  
31  
32  
33  
34  
35  
36  
37  
38  
39  
40  
41  
42  
43  
44  
45  
46  
47  
48  
49  
50  
51  
52  
53  
54  
55  
56  
57  
58  
59  
60



**Association between duration of use and success Effectiveness of pharmacotherapy for  
smoking cessation: Findings from a national survey in the general population:  
Duration of use matters**

Mohammad Siahpush, PhD  
Department of Health Promotion, Social and Behavioral Health  
College of Public Health | University of Nebraska Medical Center  
984365 Nebraska Medical Center | Omaha, NE 68198-4365 | USA

Corresponding author:  
Raees A. Shaikh, MPH  
Department of Health Promotion, Social and Behavioral Health  
College of Public Health | University of Nebraska Medical Center  
984365 Nebraska Medical Center | Omaha, NE 68198-4365 | USA  
Email: raees.shaikh@unmc.edu | Tel: 402-559-1936 | Fax: 402-559-3773

Molly McCarthy, MPH  
Department of Health Promotion, Social and Behavioral Health  
College of Public Health | University of Nebraska Medical Center  
984365 Nebraska Medical Center | Omaha, NE 68198-4365 | USA

Asia Sikora Kessler, PhD  
Department of Health Promotion, Social and Behavioral Health  
College of Public Health | University of Nebraska Medical Center  
984365 Nebraska Medical Center | Omaha, NE 68198-4365 | USA

Melissa Tibbits, PhD  
Department of Health Promotion, Social and Behavioral Health  
College of Public Health | University of Nebraska Medical Center  
984365 Nebraska Medical Center | Omaha, NE 68198-4365 | USA

Gopal K. Singh, Ph.D., M.S., M.Sc.  
U.S. Department of Health & Human Services  
5600 Fishers lane, Room 18-41 | Rockville, MD 20857 | USA

**Word Count:** ~~2582~~ **2496**

**Key Words:** Pharmacotherapy for Smoking Cessation, Duration of Pharmacotherapy Use,  
Smoking Cessation, Assisted Cessation

Formatted: Highlight



## ABSTRACT

**Aim/Objective:** To investigate the association of the duration of use of prescription medications and nicotine replacement therapy (NRT) with smoking cessation using a national sample of the general population in the United States, controlling for nicotine dependence and sociodemographic variables.

**Setting: United States**

**Participants:**

**Methods:** We used data from the 2010-2011 Tobacco Use Supplement to the US Current Population Survey. We limited the analysis to current daily smokers who made a quit attempt in the past year and former smokers who were a daily smoker one year prior to the survey (n = 8263). Respondents were asked about duration of use of prescription medication (varenicline, bupropion, other) and NRT (nicotine patch, gum/lozenges, nasal spray, and inhaler) for smoking cessation.

**Primary Outcome Measure: Successful Smoking Cessation**

**Results:** After adjusting for daily cigarette consumption and sociodemographic covariates, we found ~~overwhelming~~ evidence ( $p < 0.001$ ) for ~~an~~ association ( $p < 0.001$ ) between duration of pharmacotherapy use and smoking cessation. Adjusted cessation rates for those who used prescription medication or NRT for 5+ weeks were 28.8% and 27.8%, respectively. Adjusted cessation rates for those who used prescription medication or NRT for less than five weeks varied from 6.2% to 14.5%. Adjusted cessation rates for those who used only behavioral counseling and those who attempted to quit smoking unassisted were 16.1% and 16.4%, respectively.

1  
2  
3  
4  
5  
6  
7 **Conclusion:** Pharmacotherapies for smoking cessation can be effective in the general  
8  
9 population if used for at least five weeks. [Results suggest that e](#)ncouraging smokers who  
10  
11 intend to quit to use pharmacotherapy and to adhere to treatment duration can help improve  
12  
13 chances of a successful cessation.

#### ARTICLE SUMMARY

##### Strengths and limitations of the study:

- This was the first population-based study to examine the [association between the](#)  
duration of use of prescription medication as well as NRT for smoking cessation ~~as a~~  
~~predictor of~~ [and](#) successful smoking cessation, controlling for nicotine dependence and  
sociodemographic variables.
- A strength of this study was that it used a large nationally representative sample with a  
relatively high response rate.
- Our results strengthen the findings of clinical trials about the efficacy of  
pharmacotherapy for smoking cessation and indicate that these aids ~~could~~ [might](#) also be  
~~effective~~ [successful](#) in the general population if they are used for at least five weeks.
- [A strong possibility of reverse causation such that relapse would determine duration of](#)  
[pharmacotherapy use rather than vice versa, was a major limitation of this study.](#) Recall  
bias, especially related to the smokers previous quit attempts and the observational  
nature of the study precluding the establishment of a causal link were between the  
duration of pharmacotherapy use and successful smoking cessation, were the ~~major~~  
~~other~~ [limitations.](#) ~~of this study.~~

## INTRODUCTION

Clinical trials provide strong evidence that pharmacotherapy for smoking cessation including various forms of nicotine replacement therapies (NRT), [bB](#)upropion, or [vV](#)arenicline greatly increase the chances of a successful smoking cessation attempt.[1, 2] However, observational population-based studies have shown mixed results. While some have shown that pharmacotherapy increases smoking cessation rates,[3-6] others have concluded the opposite.[7-11] Yet, other population-based studies have shown no difference in cessation rates between those who use and those who do not use pharmacotherapy.[12, 13] The population-based reports that have found no favorable effect of pharmacotherapy have been criticized for not controlling for nicotine dependence,[14-16] which is a predictor of abstinence and is usually higher among smokers who choose to use pharmacotherapy for smoking cessation.[4, 14, 17, 18] Some of the analyses that have controlled for nicotine dependence have found a favorable effect of pharmacotherapy on smoking cessation[3, 4, 19] but others have not.[7]

An additional confounder that rarely is taken into account in population-based studies is duration of use of pharmacotherapy, which has been found to be associated with treatment success in clinical trials.[20-22] We know of one population-based study which examined the association of duration of use of pharmacotherapy with smoking cessation and found no association.[12] This study was conducted in the US where NRT can be purchased over the counter and medications such as [bB](#)upropion and [vV](#)arenicline can only be obtained as prescription drugs.

While clinical trials have high internal validity and can provide evidence for the efficacy of pharmacotherapy, observational population-based studies can address effectiveness of these

1  
2  
3  
4  
5  
6  
7 therapies under conditions that they are intended to be used.[14] Furthermore, while clinical  
8 trials provide confidence in causal associations, population-based studies are strong in  
9 representativeness and external validity. Thus, both are needed to advance the science of  
10 smoking cessation.[19]

11  
12  
13  
14  
15 There is no literature on population-based studies that examine the association of  
16 duration of NRT and prescription medication use with smoking cessation. Our aim was to use a  
17 large representative sample of the general population in the United States and investigate the  
18 association of the duration of use of prescription medications and NRT with smoking cessation,  
19 controlling for nicotine dependence and sociodemographic variables.  
20  
21  
22  
23

## 24 METHODS

### 25 Data

26  
27  
28  
29 We used data from the 2010-2011 Tobacco Use Supplement to the Current Population  
30 Survey (TUS-CPS), sponsored by the National Cancer Institute and administered by the US  
31 Census Bureau in May 2010, August 2010, and January 2011.[23] The TUS-CPS is administered  
32 as a part of the CPS, which is a monthly national survey of representative households by the US  
33 Census Bureau and the Bureau of Labor Statistics.[24] The TUS-CPS utilizes a multistage  
34 probability sampling of individuals 15 years and older, from a sample of approximately 56,000  
35 housing units, in turn selected from 792 primary sampling units. The average response rate for  
36 CPS for the 3 months of surveys used in this study was 93%, whereas for the TUS it was 63%.  
37  
38  
39  
40  
41  
42  
43  
44

### 45 Measurement

#### 46 *Successful smoking cessation:*

47  
48  
49 Individuals who reported to have smoked at least 100 cigarettes in their entire life but  
50 were not smoking at all at the time of the interview [and were a daily smoker one year prior to](#)  
51  
52

1  
2  
3  
4  
5  
6  
7  
8  
9  
10  
11  
12  
13  
14  
15  
16  
17  
18  
19  
20  
21  
22  
23  
24  
25  
26  
27  
28  
29  
30  
31  
32  
33  
34  
35  
36  
37  
38  
39  
40  
41  
42  
43  
44  
45  
46  
47  
48  
49  
50  
51  
52  
53  
54  
55  
56  
57  
58  
59  
60

[the interview \("Around this time 12 months ago were you smoking everyday ...?"\)](#) were considered to have successfully quit smoking (n = 1 769). Those who reported to have quit within the last four weeks were excluded from the analysis (n = 322). Individuals who reported to have smoked at least 100 cigarettes in their entire life, were smoking every day at the time of the interview and had made a quit attempt in the past year were considered to have failed in their quit attempt (n = 7 304). Individuals who reported to have used both prescription medication and NRT for smoking cessation were excluded from the analysis (n = 488) because after subdividing this group by categories of duration of use for prescription medication and NRT, some of the subgroup sample sizes were extremely small. The total sample size for the study was 8 263 respondents, consisting of 1 379 who successfully quit smoking and 6 884 whose quit attempt was not successful.

*Assisted quit attempt and duration of pharmacotherapy use:*

Both daily and former smokers were asked in three separate questions to indicate whether, in their last quit attempt in the past year, they used a prescription pill called (a) Chantix or [Varenicline/varenicline](#), (b) [zZyban](#), [bBupropion](#), or [wWellbutrin](#), or (b) other prescription pills. They were also asked in three separate questions to indicate whether, in their last quit attempt [in the past year](#), they used (a) a nicotine patch, (b) nicotine gum or nicotine lozenge, or (c) nicotine nasal spray or nicotine inhaler. They were also asked to indicate how many days, weeks or months they used these prescription and/or NRT medications.

Furthermore, both daily and former smokers were asked three separate questions about use of behavioral counseling in their last quit attempt in the past year. They were asked if they used a (a) telephone helpline or quitline, (b) one-on-one counseling or (c) stop smoking clinic, class or

1  
2  
3  
4  
5  
6  
7 support group. Based on the questions about use of prescription medication, NRT and  
8 behavioral counseling, we created the following two categorical variables:  
9

#### 10 Method of quit attempt

- 11 • Prescription medication only
- 12
- 13 • Prescription medication and behavioral counseling
- 14
- 15 • NRT only
- 16
- 17 • NRT and behavioral counseling
- 18
- 19 • Behavioral counseling only
- 20
- 21 • Unassisted
- 22
- 23
- 24

#### 25 Duration of use of pharmacotherapy

- 26 • Prescription medication: 5+ weeks
- 27
- 28 • Prescription medication: 3-4 weeks
- 29
- 30 • Prescription medication: 1-2 weeks<sup>1</sup>
- 31
- 32 • NRT: 5+ weeks
- 33
- 34 • NRT: 3-4 weeks
- 35
- 36 • NRT: 1-2 weeks
- 37
- 38 • Behavioral counseling only
- 39
- 40 • Unassisted
- 41
- 42
- 43

44 We categorized duration of use of pharmacotherapy based on a systematic review of  
45 studies assessing adherence to smoking cessation medication.[20] In categorizing duration of  
46 use, we made no distinction between whether or not the medication was combined with  
47 behavioral counseling as this distinction was inconsequential in the analysis.  
48  
49  
50

#### 51 **Statistical analysis**

1  
2  
3  
4  
5  
6  
7 We used multivariable logistic regression models to compute adjusted odds ratios for  
8  
9 the association of the method of quit attempt and duration of use of pharmacotherapy with  
10  
11 successful smoking cessation. Sampling weights were taken into account in the computation of  
12  
13 parameter estimates. We computed *p*-values using the jackknife, which is an unbiased  
14  
15 estimator for a statistic and a data-dependent method to calculate standard errors.[25] All  
16  
17 models controlled for daily cigarette consumption (current daily consumption among daily  
18  
19 smokers, and daily consumption 12 months ago among former smokers), age, race/ethnicity,  
20  
21 education, occupation, and family income. In order to account for the missing income data, CPS  
22  
23 uses one of the three imputation methods, relational imputation, longitudinal edits, or hot deck  
24  
25 allocation. Details of these methods are described elsewhere.[26] In multivariable logistic  
26  
27 regression models, we omitted observations that had a missing value for any of the covariates.  
28  
29 This constituted 1.7% of the full sample in the analysis pertaining to the method of quit attempt  
30  
31 (n = 142) and 6.3% of the full sample in the analysis pertaining to duration of pharmacotherapy  
32  
33 use (n = 491). We used the logistic regression results to compute adjusted cessation rates by  
34  
35 method of quit attempt and duration of use of pharmacotherapy. These adjusted rates were  
36  
37 computed by fixing covariates at their means in the fitted models.[27]

## 38 RESULTS

### 39 Sample characteristics and bivariate associations

**Table 1. Weighted sample characteristics and unadjusted smoking cessation rates across categories of each covariate**

| Variable                             | % in sample | % quit | p- value |
|--------------------------------------|-------------|--------|----------|
| Method of quit attempt               |             |        | 0.074    |
| Prescription only                    | 10.01       | 18.54  |          |
| Prescription plus behavioral support | 1.14        | 23.8   |          |
| NRT only                             | 18.26       | 14.32  |          |
| NRT plus behavioral support          | 2.54        | 18.98  |          |
| Behavioral only                      | 1.36        | 18.59  |          |
| Unassisted                           | 66.68       | 17.16  |          |
| Duration of pharmacotherapy use      |             |        | <0.001   |
| Prescription: 5+ weeks               | 4.9         | 34.38  |          |
| Prescription: 3-4 weeks              | 1.43        | 16.82  |          |
| Prescription: 1-2 weeks              | 1.89        | 15.28  |          |
| NRT: 5+ weeks                        | 6.04        | 30.65  |          |
| NRT: 3-4 weeks                       | 1.48        | 19.9   |          |
| NRT: 1-2 weeks                       | 13.48       | 7.36   |          |
| Behavioral only                      | 1.42        | 18.59  |          |
| Unassisted                           | 69.36       | 17.16  |          |
| Cigarettes per day                   |             |        | <0.001   |
| 0-9                                  | 24.48       | 15.08  |          |
| 10-14                                | 30.04       | 12.58  |          |
| 15-19                                | 10.31       | 12.58  |          |
| 20-29                                | 29.23       | 21.83  |          |
| 30+                                  | 5.93        | 29.59  |          |
| Sex                                  |             |        | 0.975    |
| Female                               | 50.12       | 16.99  |          |
| Male                                 | 49.88       | 17.02  |          |
| Age                                  |             |        | < 0.001  |
| 18-24                                | 11.79       | 15.32  |          |
| 25-39                                | 33.08       | 18.17  |          |
| 40-54                                | 32.33       | 14.49  |          |
| 55+                                  | 22.8        | 19.77  |          |
| Race/Ethnicity                       |             |        | 0.003    |
| Non-Hispanic White                   | 76.17       | 17.99  |          |
| Non-Hispanic Black                   | 11.34       | 12.98  |          |
| Hispanic                             | 7.39        | 15.73  |          |
| Other                                | 5.09        | 13.15  |          |
| Education                            |             |        | <0.001   |
| Less than high school                | 15.25       | 13.15  |          |
| High school diploma                  | 73.34       | 16.74  |          |
| Bachelor's degree                    | 11.41       | 23.91  |          |
| Occupation                           |             |        | <0.001   |
| Professional                         | 14.33       | 20.99  |          |
| Service                              | 12.31       | 13.96  |          |
| Sales                                | 14.5        | 18.45  |          |
| Farming/construction/production      | 17.28       | 13.08  |          |
| Unemployed                           | 12.01       | 13.81  |          |
| Not in labor force                   | 29.57       | 19.24  |          |
| Family income                        |             |        | <0.001   |
| <\$25,000                            | 36.27       | 13.94  |          |
| \$25,000-\$49,000                    | 31.65       | 17.21  |          |
| \$50,000-\$99,000                    | 23.86       | 19.63  |          |
| \$100,000+                           | 8.23        | 22.17  |          |
| Full sample                          |             | 17.01  |          |

Note: Sample size for each covariate varies from 7 820 to 8 263 depending on the number of missing values for that covariate.  
P-values are based on chi-square tests.

Formatted: Font: (Default) Calibri, Italic



1  
2  
3  
4  
5  
6  
7 Weighted sample characteristics are shown in Table 1. About 66.7% of the sample  
8 reported to have made an unassisted quit attempt; 10% used only prescription medication;  
9 1.1% used prescription medication plus behavioral counseling; 18.2% used only NRT; 2.5% used  
10 NRT plus behavioral therapy; and 1.3% used only behavioral counseling. When broken down by  
11 duration of use, while most of those who used prescription medication did so for five or more  
12 weeks, the great majority of those who used NRT did so for 2 weeks or less. The reported  
13 number of cigarettes smoked per day was 14 or less for about 54.5% of the sample. Age was  
14 distributed with 11.8% of the sample under 25 years of age, 33% between 25-39 years, 32.3%  
15 between 40-54 years, and 22.8% 55 years or older. The sample was 76% non-Hispanic white,  
16 11.3% non-Hispanic Black, 7.4% Hispanic, and 5% of other race/ethnicity. About 15.2% of the  
17 sample did not have a high school diploma, 73.3% had high school diploma, and 11.4% had at  
18 least a bachelor's degree. The distribution of family income was skewed such that over a third  
19 of the sample had an income of less than \$25 000 and less than a tenth of the sample had an  
20 income of \$100 000 or greater.  
21  
22

23  
24  
25  
26  
27  
28 Table 1 also provides smoking cessation rates across categories of each covariate,  
29 indicating bivariate (unadjusted) associations between the covariates and quitting. Cessation  
30 rate was 17% in the whole sample. There was very little evidence that method of quit attempt  
31 was associated with cessation rate ( $p < 0.074$ ). However, ~~there was overwhelming evidence~~  
32 ~~that the~~ duration of pharmacotherapy use ~~was associated with quitting~~ ( $p < 0.001$ ), ~~such that~~  
33 ~~the use of prescription medication or NRT for 5+ weeks was associated with remarkably higher~~  
34 ~~cessation rates compared to the use of these products for shorter durations, behavioral~~  
35 ~~counseling or unassisted quit attempts.~~ ~~Number of cigarettes smoked per day had a~~  
36 ~~curvilinear relationship with cessation such that those who smoked 0-9 cigarettes and those~~  
37 ~~who smoked 20+ cigarettes per day had a higher cessation rate than others~~ ( $p < 0.001$ ), ~~a~~ Age  
38 ~~had a curvilinear relationship with cessation in that individuals in the 25-39 and 55+ age~~  
39 ~~categories had notably higher cessation rates than others~~ ( $p < 0.001$ ), ~~and~~ ~~ra~~ Race/ethnicity ( $p$   
40 ~~= 0.003~~) ~~were~~ ~~was~~ ~~all~~ associated with quitting. ~~such that Non-Hispanic Whites had the highest~~  
41 ~~and non-Hispanic Blacks had the lowest cessation rates~~ ( $p = 0.003$ ). ~~Higher~~ Higher socioeconomic  
42 status as measured by education, occupation, and income was associated with a higher  
43 cessation rate ( $p < 0.001$  for all three indicators of socioeconomic status). Sex had no  
44 association with cessation.  
45  
46  
47  
48  
49  
50  
51  
52  
53  
54  
55  
56  
57  
58  
59  
60

**Adjusted results from multivariable logistic regression models**

Table 2 provides adjusted odds ratios for the association of method of quit attempt with the probability of smoking cessation. Figure 1 shows the adjusted cessation rates for various quitting methods. Unlike the unadjusted results in Table 1 which provided very little evidence of an association between quitting method and successful cessation, the adjusted results

Formatted: Line spacing: 1.5 lines

Formatted: Left, Line spacing: 1.5 lines

**Table 2. Adjusted<sup>a</sup> odds ratios and 95% confidence intervals (CI) for the association of method of quit attempt and duration of pharmacotherapy use with the probability of successful smoking cessation**

|                                             | OR (95% CI)      | p-value |
|---------------------------------------------|------------------|---------|
| Method of quit attempt (n = 8 121)          |                  |         |
| Prescription only                           | 1.00             | 0.025   |
| Prescription plus behavioral support        | 1.42 (0.76-2.66) | 0.277   |
| NRT only                                    | 0.78 (0.59-1.02) | 0.072   |
| NRT plus behavioral support                 | 1.17 (0.73-1.86) | 0.513   |
| Behavioral only                             | 1.06 (0.57-1.97) | 0.844   |
| Unassisted                                  | 1.09 (0.87-1.37) | 0.464   |
| Duration of pharmacotherapy use (n = 7 772) |                  |         |
| Prescription: 5+ weeks                      | 1.00             | < 0.001 |
| Prescription: 3-4 weeks                     | 0.42 (0.21-0.84) | 0.014   |
| Prescription: 1-2 weeks                     | 0.38 (0.22-0.66) | 0.001   |
| NRT: 5+ weeks                               | 0.95 (0.67-1.36) | 0.786   |
| NRT: 3-4 weeks                              | 0.53 (0.29-0.97) | 0.040   |
| NRT: 1-2 weeks                              | 0.16 (0.11-0.24) | <0.001  |
| Behavioral only                             | 0.47 (0.25-0.90) | 0.022   |
| Unassisted                                  | 0.48 (0.37-0.64) | <0.001  |

<sup>a</sup> Adjusted for the effect of number of cigarettes smoked per day, sex, age, race/ethnicity, education, occupation, and family income.

Figure 1 here.....

Formatted: Font: Not Bold

Table 2 provides adjusted odds ratios for the association of method of quit attempt with the probability of smoking cessation. Figure 1 shows the adjusted cessation rates for various quitting methods. Unlike the unadjusted results in Table 1 which provided very little evidence of an association between quitting method and successful cessation, the adjusted results

Formatted: Indent: First line: 0"

revealed some evidence of an association ( $p = 0.025$ ). The highest cessation rate was among those who used prescription medication and behavioral counseling (20.4%) followed by those who used NRT and behavioral counseling (17.4%), attempted to quit unassisted (16.4%), used

1  
2  
3  
4  
5  
6  
7 behavioral counseling only (16.1%), and those who used prescription medication only (15.3%).  
8 The lowest cessation rate was among those who only used NRT as a quitting method (12.3%).  
9

10  
11 Figure 2 here.....

Formatted: Font: Not Bold

12  
13  
14 Table 2 also provides adjusted odds ratios for the association of duration of  
15 pharmacotherapy use with the probability of smoking cessation. Figure 2 shows the adjusted  
16 cessation rates for various durations of pharmacotherapy use. Consistent with the unadjusted  
17 results in Table 1, the adjusted results [in Table 2 also](#) provide **strong** evidence ( $p < 0.001$ ) of an  
18 association between duration of pharmacotherapy use and successful cessation. [As shown in](#)  
19 [Figure 2, cessation rates were highest among those who used prescription medication for 5+](#)  
20 [weeks \(28.8%\) and those who used NRT for 5+ weeks \(27.8%\) had higher cessation rates,](#)  
21 [28.8% and 27.8% respectively, than others.](#) Cessation rates for those who used prescription  
22 medication or NRT for less than five weeks varied from 6.2% to 14.5%. Cessation rates for those  
23 who used only behavioral counseling and those who attempted to quit smoking unassisted  
24 were 16.1% and 16.4%, respectively.  
25

26  
27 The results pertaining to the association of other covariates with successful cessation  
28 were very similar in the multivariable regression models for method of quit attempt and  
29 duration of pharmacotherapy use. These results were consistent with bivariate associations  
30 reported above, except for the fact that there was very little evidence for an association of  
31 race/ethnicity and smoking cessation in multivariable analyses.  
32

### 33 34 35 36 37 38 39 40 41 42 43 44 45 46 47 48 49 50 51 52 53 54 55 56 57 58 59 60

## DISCUSSION

This is the first population-based study to examine the [association of successful smoking](#)  
[cessation and](#) duration of use of prescription medication as well as NRT for smoking cessation  
[as a predictor of successful smoking cessation.](#) We found that using pharmacotherapy for five  
weeks or longer is associated with a **remarkably** higher probability of cessation compared to  
using pharmacotherapy for shorter durations, only using behavioral counseling or trying to quit  
unassisted.

Our findings are consistent with the results of a study of a hospital-based cessation  
program where participants who used NRT for 5 weeks or longer were found to have a higher

1  
2  
3  
4  
5  
6  
7 cessation rate at 6-month follow-up.[28] However, our findings are not consistent with those of  
8 a population-based study which did not find any evidence that using NRT for more than 6  
9 weeks versus not using NRT at all was associated with smoking cessation.[12] In that study, the  
10 survey response rate was low, the sample size was small and prescription medications were not  
11 examined. These factors could explain the discrepant findings.  
12

13  
14 While we found that smokers who used pharmacotherapy for at least 5 weeks have a far  
15 more favorable outcome than others, only 11% of the sample was in this group and notably  
16 about 70% of the sample did not use any pharmacotherapy for smoking cessation. Previous  
17 research indicates that barriers to the use of these cessation aids include concerns with their  
18 addictiveness, cost and side effects, as well as the belief that a treatment of any kind is not  
19 needed to quit smoking.[29-31]  
20

21  
22 A major weakness/limitation of the study is that there is a strong possibility of reverse  
23 causation such that relapse would determine duration of pharmacotherapy use rather than vice  
24 versa.[35] Smokers who use varenicline to quit smoking are asked to completely stop smoking  
25 one week after their quit date.[36] Thus, individuals who use pharmacotherapies and relapse a  
26 short while after a quit attempt may stop using these aids. In such cases, an unsuccessful quit  
27 attempt would cause a short duration of pharmacotherapy use instead of the reverse.  
28 Furthermore, because of its observational nature, our study cannot establish a causal link  
29 between the duration of pharmacotherapy use and successful smoking cessation. While our  
30 analyses controlled for several important predictors of cessation including daily cigarette  
31 consumption, age, race, education, occupation, and income, it is possible that there might be  
32 residual confounding related to variables such as depression, anxiety, alcohol use, and financial  
33 stress.[33, 34] Such confounding would further weaken the ability of the study to imply  
34 causation.  
35

36  
37 Another weakness of the study relates to the fact that smokers forget many quit  
38 attempts [7, 32] and they are more prone to recall attempts that used pharmacotherapy than  
39 those that did not.[14, 17] Such recall bias can underestimate the success rate of attempts at  
40 quitting with the aid of pharmacotherapy.[17] Another limitation of the study is that because of  
41 its observational nature, our study cannot establish a causal link between the duration of  
42 pharmacotherapy use and successful smoking cessation. While our analyses controlled for  
43 several important predictors of cessation including daily cigarette consumption, age, race,  
44  
45  
46  
47  
48  
49  
50  
51  
52  
53

1  
2  
3  
4  
5  
6  
7  
8  
9  
10  
11  
12  
13  
14  
15  
16  
17  
18  
19  
20  
21  
22  
23  
24  
25  
26  
27  
28  
29  
30  
31  
32  
33  
34  
35  
36  
37  
38  
39  
40  
41  
42  
43  
44  
45  
46  
47  
48  
49  
50  
51  
52  
53  
54  
55  
56  
57  
58  
59  
60

education, occupation, and income, it is possible that there is residual confounding related to variables such as depression, anxiety, alcohol use, and financial stress.[33, 34] Such confounding would further weaken the ability of the study to imply causation. Moreover, there is a possibility of reverse causation such that relapse would determine duration of pharmacotherapy use rather than vice versa.[35] Smokers who use Varenicline to quit smoking are asked to completely stop smoking one week after their quit date.[36] Thus, individuals who use pharmacotherapies and relapse a short while after a quit attempt may stop using these aids. In such cases, an unsuccessful quit attempt would cause a short duration of pharmacotherapy use instead of the reverse.

A strength of this study was that it used a large nationally representative sample with a relatively high response rate. This was the first time that questions about the duration of pharmacotherapy use were included in the TUS-CPS. We know of no other national data on the general population that provide information on this variable. Many population-based studies of pharmacotherapies for smoking cessation have found these aids to be ineffective. It is likely that if these studies were able to account for duration of use, their findings would have been different. However, data on duration of use is not routinely collected and it would require a large sample size to provide a reliable estimate of the effect of using these medications for duration of a few weeks. Nonetheless, it would likely be an important area for further research to establish the relationship between duration of use of pharmacotherapy and successful quitting in the general population.

Our results strengthen the findings of clinical trials about the efficacy of pharmacotherapy for smoking cessation and indicate that these aids can might also be effective successful in the general population if they are used for at least five weeks. Smokers who intend to quit should be encouraged to use pharmacotherapy and adhere to their recommended duration of use.

#### CONTRIBUTORSHIP STATEMENT

We assure that all authors included on a paper fulfill the criteria of authorship. All have contributed in the conception and design, analysis and interpretation of data, drafting of the article and revising it critically for important intellectual content, and final approval of the version to be published. In addition we also assure that there is no one else who fulfills the criteria but has not been included as an author. Dr. Mohammad Siahpush was instrumental in conceptualization of research study, data analysis, and writing of the initial draft of the manuscript. Raees Shaikh and Molly McCarthy contributed in the development of study, data analysis, and preparation of the results section. They also helped with writing the manuscript and editing it for final submission. Dr. Asia Sikora helped with literature review, provided inputs for the materials and method section, and contributed to writing and editing the manuscript. Dr. Melissa Tibbits was involved with literature review and data analysis and provided her inputs to the entire manuscript. Dr. Gopal Singh was involved with formulation of research study and helped in the data analysis and contributed in the writing and editing of the final manuscript.

#### DETAILS OF FUNDING

This work did not require or receive funding.

#### CONFLICT OF INTEREST STATEMENT

All authors have completed the Unified Competing Interest form (available on request from the corresponding author) declare that no support was received from any organization for the submitted work and that there was no financial relationships with any organizations that might have an interest in the submitted work in the previous three years, neither did we have other relationships or activities that could appear to have influenced the submitted work.

#### ETHICAL APPROVAL STATEMENT

No ethical approval was required for this work.

#### DATA SHARING STATEMENT

No additional data used or available.

#### FIGURE LEGENDS

Figure1: Adjusted Cessation Rate by Method of Quit Attempt

Figure2: Adjusted Cessation Rate by Duration of Pharmacotherapy Use

## REFERENCES

- 1 Raupach T, van Schayck C,P. Pharmacotherapy for smoking cessation: current advances and research topics. *CNS Drugs* 2011;**25**(5):371-82.
- 2 Cahill K, Stevens S, Lancaster T. Pharmacological Treatments for Smoking Cessation. *JAMA* 2014;**311**(2):193-4.
- 3 Kasza KA, Hyland AJ, Borland R, et al. Effectiveness of stop-smoking medications: findings from the International Tobacco Control (ITC) Four Country Survey. *Addiction* 2013;**108**(1):193-202.
- 4 West R, Zhou X. Is nicotine replacement therapy for smoking cessation effective in the “real world”? Findings from a prospective multinational cohort study. *Thorax* 2007;**62**(11):998-1002.
- 5 Cummings KM, Fix B, Celestino P, et al. Reach, efficacy, and cost-effectiveness of free nicotine medication giveaway programs. *Journal of Public Health Management and Practice* 2006;**12**(1):37-43.
- 6 Miller N, Frieden TR, Liu SY, et al. Effectiveness of a large-scale distribution programme of free nicotine patches: a prospective evaluation. *Lancet* 2005;**365**:1849-54.
- 7 Shiffman S, Brockwell SE, Pillitteri JL, et al. Use of smoking-cessation treatments in the United States. *American Journal of Preventive Medicine* 2008;**34**(2):102-11.
- 8 Alberg AJ, Patnaik JL, May JW, et al. Nicotine replacement therapy use among a cohort of smokers. *Journal of addictive diseases* 2005;**24**(1):101-13.
- 9 Lee CW, Kahende J. Factors associated with successful smoking cessation in the United States, 2000. *American Journal of Public Health* 2007;**97**(8):1503-9.
- 10 Hagimoto A, Nakamura M, Morita T, et al. Smoking cessation patterns and predictors of quitting smoking among the Japanese general population: a 1-year follow-up study. *Addiction* 2010;**105**(1):164-73.
- 11 Yang J, Hammond D, Driezen P, et al. The use of cessation assistance among smokers from China: Findings from the ITC China Survey. *BMC public health* 2011;**11**(1):75.
- 12 Alpert HR, Connolly GN, Biener L. A prospective cohort study challenging the effectiveness of population-based medical intervention for smoking cessation. *Tobacco control* 2013;**22**(1):32-7.
- 13 Pierce JP, Gilpin EA. Impact of over-the-counter sales on effectiveness of pharmaceutical aids for smoking cessation. *Jama* 2002;**288**(10):1260-4.
- 14 Hughes JR, Peters EN, Naud S. Effectiveness of over-the-counter nicotine replacement therapy: a qualitative review of nonrandomized trials. *Nicotine & tobacco research : official journal of the Society for Research on Nicotine and Tobacco* 2011;**13**(7):512-22.
- 15 Walsh RA. Over-the-counter nicotine replacement therapy: a methodological review of the evidence supporting its effectiveness. *Drug and Alcohol Review* 2008;**27**(5):529-47.

- 1  
2  
3  
4  
5  
6  
7 16 Kotz D, West R. Explaining the social gradient in smoking cessation: it's not in the trying, but in the  
8 succeeding. *Tobacco control* 2009;**18**(1):43-6.  
9  
10 17 Borland R, Partos TR, Cummings KM. Systematic biases in cross-sectional community studies may  
11 underestimate the effectiveness of stop-smoking medications. *Nicotine & Tobacco Research*  
12 2012;**14**(12):1483-7.  
13  
14 18 Shiffman S, Di Marino ME, Sweeney CT. Characteristics of selectors of nicotine replacement therapy.  
15 *Tobacco control* 2005;**14**(5):346-55.  
16  
17 19 Kotz D, Brown J, West R. 'Real-world' effectiveness of smoking cessation treatments: a population  
18 study. *Addiction (Abingdon, England)* 2014;**109**(3):491-9.  
19  
20 20 Raupach T, Brown J, Herbec A, et al. A systematic review of studies assessing the association between  
21 adherence to smoking cessation medication and treatment success. *Addiction* 2014;**109**(1):35-43.  
22  
23 21 Shiffman S, Sweeney CT, Ferguson SG, et al. Relationship between adherence to daily nicotine patch  
24 use and treatment efficacy: Secondary analysis of a 10 week randomized, double-blind, placebo-  
25 controlled clinical trial simulating over-the-counter use in adult smokers. *Clinical therapeutics*  
26 2008;**30**(10):1852-8.  
27  
28 22 Lee JH, Jones PG, Bybee K, et al. A longer course of varenicline therapy improves smoking cessation  
29 rates. *Preventive cardiology* 2008;**11**(4):210-4.  
30  
31 23 U.S. Department of Commerce, Census Bureau. National Cancer Institute and Centers for Disease  
32 Control and Prevention Co-sponsored Tobacco Use Supplement to the Current Population Survey (2010-  
33 2011). 2012;.  
34  
35 24 U.S. Census Bureau. Current population survey: Design and methodology. *Technical Paper TP63RV,*  
36 *Bureau of Labor Statistics and US Census Bureau, Washington DC* October 2006;**2014**(February 10).  
37  
38 25 Gould W. Jackknife estimation. *Stata Technical Bulletin* 1995;**4**(24).  
39  
40 26 The U.S. Census Bureau. Current Population Survey: Imputation of Unreported Data Items.  
41 2014;**2014**(03/18).  
42  
43 27 Williams R. Using the margins command to estimate and interpret adjusted predictions and marginal  
44 effects. *Stata Journal* 2012;**12**(2).  
45  
46 28 Raupach T, Shahab L, Neubert K, et al. Implementing a hospital-based smoking cessation programme:  
47 evidence for a learning effect. *Patient education and counseling* 2008;**70**(2):199-204.  
48  
49 29 Fu SS, Burgess D, van Ryn M, et al. Views on smoking cessation methods in ethnic minority  
50 communities: a qualitative investigation. *Preventive medicine* 2007;**44**(3):235-40.  
51  
52 30 Ryan KK, Garrett-Mayer E, Alberg AJ, et al. Predictors of cessation pharmacotherapy use among black  
53 and non-Hispanic white smokers. *Nicotine & tobacco research : official journal of the Society for*  
54 *Research on Nicotine and Tobacco* 2011;**13**(8):646-52.  
55  
56  
57  
58  
59  
60



1  
2  
3  
4  
5  
6  
7  
8  
9  
10  
11  
12  
13  
14  
15  
16  
17  
18  
19  
20  
21  
22  
23  
24  
25  
26  
27  
28  
29  
30  
31  
32  
33  
34  
35  
36  
37  
38  
39  
40  
41  
42  
43  
44  
45  
46  
47  
48  
49  
50  
51  
52  
53  
54  
55  
56  
57  
58  
59  
60

31 Cokkinides VE, Ward E, Jemal A, et al. Under-use of smoking-cessation treatments: results from the National Health Interview Survey, 2000. *American Journal of Preventive Medicine* 2005;**28**(1):119-22.

32 Berg CJ, An LC, Kirch M, et al. Failure to report attempts to quit smoking. *Addictive Behaviors* 2010;**35**(10):900-4.

33 Caponnetto P, Polosa R. Common predictors of smoking cessation in clinical practice. *Respiratory medicine* 2008;**102**(8):1182-92.

34 Siahpush M, Carlin JB. Financial stress, smoking cessation and relapse: results from a prospective study of an Australian national sample. *Addiction* 2006;**110**:121-7.

35 Shiffman S. Use of more nicotine lozenges leads to better success in quitting smoking. *Addiction* 2007;**102**(5):809-14.

36 Pfizer Inc. Getting started with CHANTIX: Things to Remember. 2014;**2014**(March 2014).

1  
2  
3  
4  
5  
6  
7  
8  
9  
10  
11  
12  
13  
14  
15  
16  
17  
18  
19  
20  
21  
22  
23  
24  
25  
26  
27  
28  
29  
30  
31  
32  
33  
34  
35  
36  
37  
38  
39  
40  
41  
42  
43  
44  
45  
46  
47  
48  
49  
50  
51  
52  
53  
54  
55  
56  
57  
58  
59  
60

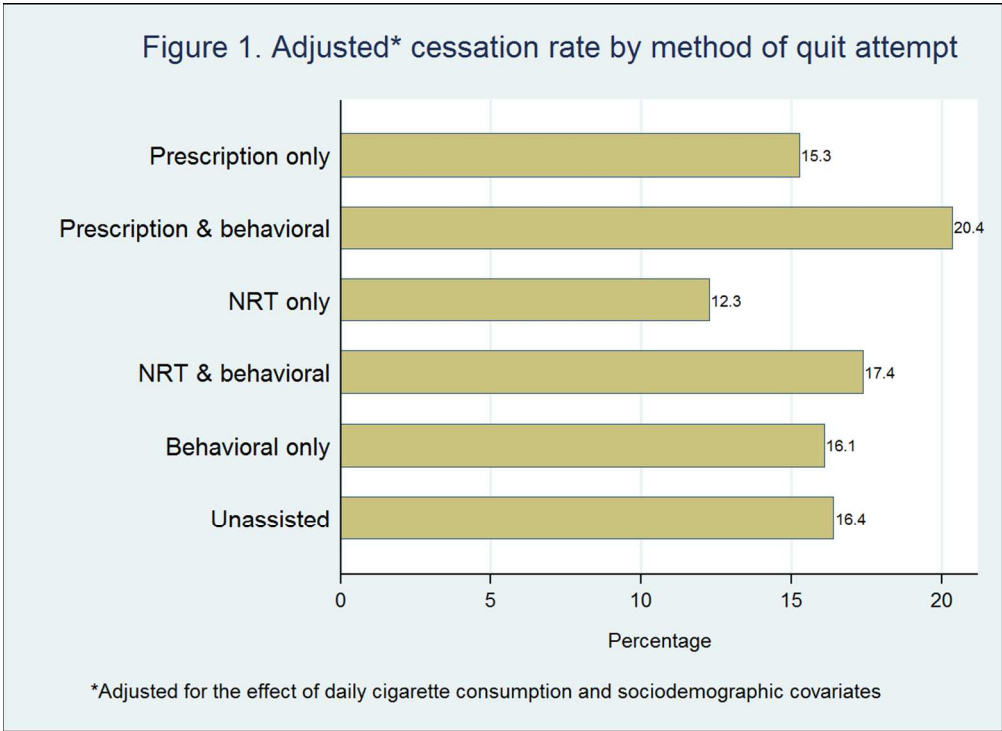

Figure1- Adjusted Cessation Rate by Method of Quit Attempt  
105x76mm (300 x 300 DPI)

view only

1  
2  
3  
4  
5  
6  
7  
8  
9  
10  
11  
12  
13  
14  
15  
16  
17  
18  
19  
20  
21  
22  
23  
24  
25  
26  
27  
28  
29  
30  
31  
32  
33  
34  
35  
36  
37  
38  
39  
40  
41  
42  
43  
44  
45  
46  
47  
48  
49  
50  
51  
52  
53  
54  
55  
56  
57  
58  
59  
60

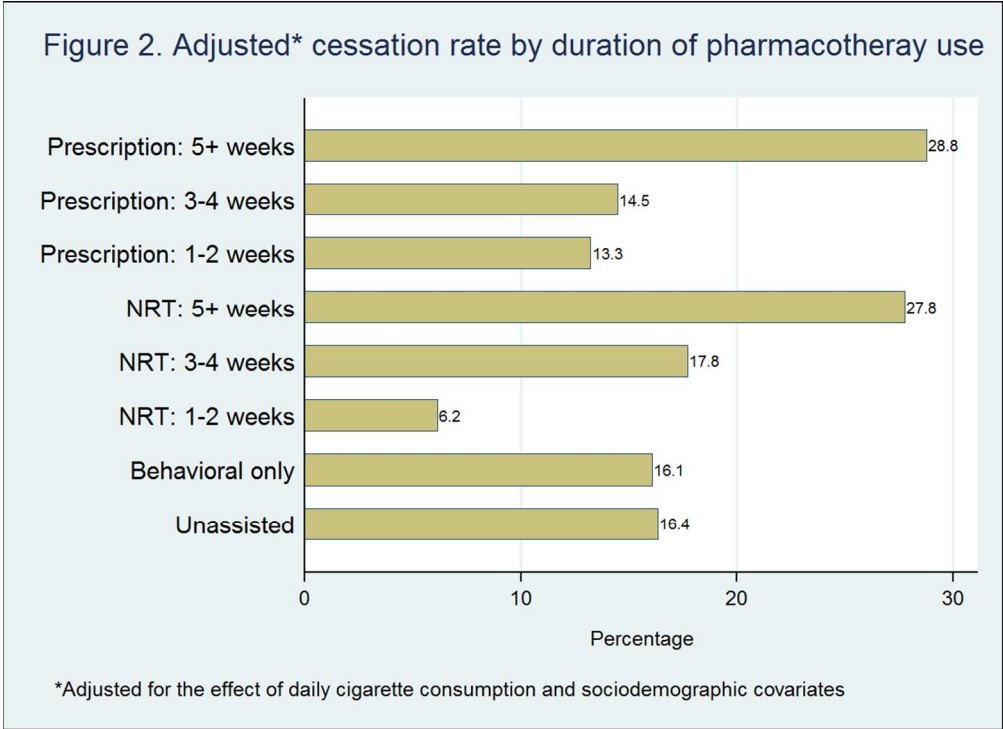

Figure2- Adjusted Cessation Rate by Duration of Pharmacotherapy Use  
105x76mm (300 x 300 DPI)

View only

## STROBE Statement Checklist

|                               | <b>Checklist</b> |
|-------------------------------|------------------|
| <b>Title and abstract</b>     | Yes              |
| <b>Introduction</b>           |                  |
| Background/rationale          | Yes              |
| Objectives/Aims               | Yes              |
| <b>Methods</b>                |                  |
| Data sources                  | Yes              |
| Measurement                   | Yes              |
| Statistical methods           | Yes              |
| <b>Results</b>                |                  |
| Descriptive data              | Yes              |
| Main results                  | Yes              |
| <b>Discussion</b>             |                  |
| Key results                   | Yes              |
| Interpretation                | Yes              |
| Generalizability/Strengths    | Yes              |
| Limitations                   | Yes              |
| <b>Other information</b>      |                  |
| Funding                       | Yes              |
| Competing Interest Statement: | Yes              |
| Ethical Approval Statement    | Yes              |
| Contributorship Statement     | Yes              |

# BMJ Open

## Association between duration of use of pharmacotherapy and smoking cessation: Findings from a national survey

|                                 |                                                                                                                                                                                                                                                                                                                                                                                                                                                                                                                                                                                                                                                                                                                                                                                                                                                                                                 |
|---------------------------------|-------------------------------------------------------------------------------------------------------------------------------------------------------------------------------------------------------------------------------------------------------------------------------------------------------------------------------------------------------------------------------------------------------------------------------------------------------------------------------------------------------------------------------------------------------------------------------------------------------------------------------------------------------------------------------------------------------------------------------------------------------------------------------------------------------------------------------------------------------------------------------------------------|
| Journal:                        | <i>BMJ Open</i>                                                                                                                                                                                                                                                                                                                                                                                                                                                                                                                                                                                                                                                                                                                                                                                                                                                                                 |
| Manuscript ID:                  | bmjopen-2014-006229.R2                                                                                                                                                                                                                                                                                                                                                                                                                                                                                                                                                                                                                                                                                                                                                                                                                                                                          |
| Article Type:                   | Research                                                                                                                                                                                                                                                                                                                                                                                                                                                                                                                                                                                                                                                                                                                                                                                                                                                                                        |
| Date Submitted by the Author:   | 16-Dec-2014                                                                                                                                                                                                                                                                                                                                                                                                                                                                                                                                                                                                                                                                                                                                                                                                                                                                                     |
| Complete List of Authors:       | Siahpush, Mohammad; University of Nebraska Medical Center, Department of Health Promotion, Social and Behavioral Health<br>Shaikh, Raees; College of Public Health - University of Nebraska Medical Center, Department of Health Promotion, Social and Behavioral Health<br>McCarthy, Molly; University of Nebraska Medical Center, Department of Health Promotion, Social and Behavioral Health<br>Sikora, Asia; University of Nebraska Medical Center, Department of Health Promotion, Social and Behavioral Health<br>Tibbits, Melissa; University of Nebraska Medical Center, Department of Health Promotion, Social and Behavioral Health; University of Nebraska Medical Center, Department of Health Promotion, Social and Behavioral Health<br>Singh, Gopal; Health Resources and Services Administration, Maternal and Child Health Bureau, US Department of Health and Human Services |
| <b>Primary Subject Heading</b>: | Smoking and tobacco                                                                                                                                                                                                                                                                                                                                                                                                                                                                                                                                                                                                                                                                                                                                                                                                                                                                             |
| Secondary Subject Heading:      | Addiction, Public health                                                                                                                                                                                                                                                                                                                                                                                                                                                                                                                                                                                                                                                                                                                                                                                                                                                                        |
| Keywords:                       | PREVENTIVE MEDICINE, PUBLIC HEALTH, SOCIAL MEDICINE                                                                                                                                                                                                                                                                                                                                                                                                                                                                                                                                                                                                                                                                                                                                                                                                                                             |
|                                 |                                                                                                                                                                                                                                                                                                                                                                                                                                                                                                                                                                                                                                                                                                                                                                                                                                                                                                 |

SCHOLARONE™  
Manuscripts

1 **Association between duration of use of pharmacotherapy and smoking cessation: Findings**  
2 **from a national survey**  
3  
4

5 Mohammad Siahpush, PhD  
6

7 Department of Health Promotion, Social and Behavioral Health  
8 College of Public Health | University of Nebraska Medical Center  
9 984365 Nebraska Medical Center | Omaha, NE 68198-4365 | USA  
10

11  
12 Corresponding author:

13 Raees A. Shaikh, MPH  
14

15 Department of Health Promotion, Social and Behavioral Health  
16 College of Public Health | University of Nebraska Medical Center  
17 984365 Nebraska Medical Center | Omaha, NE 68198-4365 | USA  
18 Email: raees.shaikh@unmc.edu | Tel: 402-559-1936 | Fax: 402-559-3773  
19  
20  
21

22 Molly McCarthy, MPH  
23

24 Department of Health Promotion, Social and Behavioral Health  
25 College of Public Health | University of Nebraska Medical Center  
26 984365 Nebraska Medical Center | Omaha, NE 68198-4365 | USA  
27  
28

29 Asia Sikora Kessler, PhD  
30

31 Department of Health Promotion, Social and Behavioral Health  
32 College of Public Health | University of Nebraska Medical Center  
33 984365 Nebraska Medical Center | Omaha, NE 68198-4365 | USA  
34  
35

36 Melissa Tibbits, PhD  
37

38 Department of Health Promotion, Social and Behavioral Health  
39 College of Public Health | University of Nebraska Medical Center  
40 984365 Nebraska Medical Center | Omaha, NE 68198-4365 | USA  
41  
42  
43

44 Gopal K. Singh, Ph.D., M.S., M.Sc.  
45

46 U.S. Department of Health & Human Services  
47 5600 Fishers lane, Room 18-41 | Rockville, MD 20857 | USA  
48  
49

50 **Word Count**2496

51 **Key Words:** Pharmacotherapy for Smoking Cessation, Duration of Pharmacotherapy Use,  
52 Smoking Cessation, Assisted Cessation  
53  
54  
55  
56  
57  
58  
59  
60

## ABSTRACT

**Objective:** To investigate the association of the duration of use of prescription medications and nicotine replacement therapy (NRT) with smoking cessation using a national sample of the general population in the United States, controlling for nicotine dependence and sociodemographic variables.

**Setting:** United States

**Participants:** We used data from the 2010-2011 Tobacco Use Supplement to the US Current Population Survey. We limited the analysis to current daily smokers who made a quit attempt in the past year and former smokers who were a daily smoker one year prior to the survey (n = 8 263). Respondents were asked about duration of use of prescription medication (varenicline, bupropion, other) and NRT (nicotine patch, gum/lozenges, nasal spray, and inhaler) for smoking cessation.

**Primary Outcome Measure:** Successful Smoking Cessation. Individuals who reported to have smoked at least 100 cigarettes in their lifetime but were not smoking at all at the time of the interview and were a daily smoker one year prior to the interview were considered to have successfully quit smoking.

**Results:** After adjusting for daily cigarette consumption and sociodemographic covariates, we found evidence for an association between duration of pharmacotherapy use and smoking cessation ( $p < 0.001$ ). Adjusted cessation rates for those who used prescription medication or NRT for 5+ weeks were 28.8% and 27.8%, respectively. Adjusted cessation rates for those who used prescription medication or NRT for less than five weeks varied from 6.2% to 14.5%. Adjusted cessation rates for those who used only behavioral counseling and those who attempted to quit smoking unassisted were 16.1% and 16.4%, respectively.

**Conclusion:** Use of pharmacotherapy for at least five weeks is associated with increased likelihood of successful smoking cessation. Results suggest that encouraging smokers who intend to quit to use pharmacotherapy and to adhere to treatment duration can help improve chances of a successful cessation.

## ARTICLE SUMMARY

**Strengths and limitations of the study:**

- This was the first population-based study to examine the association between the duration of use of prescription medication as well as NRT for smoking cessation and successful smoking cessation, controlling for nicotine dependence and sociodemographic variables.
- A strength of this study was that it used a large nationally representative sample with a relatively high response rate.
- Our results strengthen the findings of clinical trials about the efficacy of pharmacotherapy for smoking cessation and indicate that these aids might also be successful in the general population if they are used for at least five weeks.
- A strong possibility of reverse causation such that relapse would determine duration of pharmacotherapy use rather than vice versa, was a major limitation of this study. Recall bias, especially related to the smokers previous quit attempts and the observational nature of the study precluding the establishment of a causal link were between the duration of pharmacotherapy use and successful smoking cessation, were the other limitations.



## INTRODUCTION

1  
2  
3  
4  
5  
6  
7  
8  
9  
10  
11  
12  
13  
14  
15  
16  
17  
18  
19  
20  
21  
22  
23  
24  
25  
26  
27  
28  
29  
30  
31  
32  
33  
34  
35  
Clinical trials provide strong evidence that pharmacotherapy for smoking cessation including various forms of nicotine replacement therapies (NRT), bupropion, or varenicline greatly increase the chances of a successful smoking cessation attempt.[1, 2] However, observational population-based studies have shown mixed results. While some have shown that pharmacotherapy increases smoking cessation rates,[3-6] others have concluded the opposite.[7-11] Yet, other population-based studies have shown no difference in cessation rates between those who use and those who do not use pharmacotherapy.[12, 13] The population-based reports that have found no favorable effect of pharmacotherapy have been criticized for not controlling for nicotine dependence,[14-16] which is a predictor of abstinence and is usually higher among smokers who choose to use pharmacotherapy for smoking cessation.[4, 14, 17, 18] Some of the analyses that have controlled for nicotine dependence have found a favorable effect of pharmacotherapy on smoking cessation[3, 4, 19] but others have not.[7]

36  
37  
38  
39  
40  
41  
42  
43  
44  
45  
46  
47  
48  
49  
50  
51  
52  
53  
An additional confounder that rarely is taken into account in population-based studies is duration of use of pharmacotherapy, which has been found to be associated with treatment success in clinical trials.[20-22] We know of one population-based study which examined the association of duration of use of pharmacotherapy with smoking cessation and found no association.[12] This study was conducted in the US where NRT can be purchased over the counter and medications such as bupropion and varenicline can only be obtained as prescription drugs.

54  
55  
56  
57  
58  
59  
60  
While clinical trials have high internal validity and can provide evidence for the efficacy of pharmacotherapy, observational population-based studies can address effectiveness of these

1 therapies under conditions that they are intended to be used.[14] Furthermore, while clinical  
2  
3 trials provide confidence in causal associations, population-based studies are strong in  
4  
5 representativeness and external validity. Thus, both are needed to advance the science of  
6  
7 smoking cessation.[19]  
8  
9

10  
11 There is no literature on population-based studies that examine the association of  
12  
13 duration of NRT and prescription medication use with smoking cessation. Our aim was to use a  
14  
15 large representative sample of the general population in the United States and investigate the  
16  
17 association of the duration of use of prescription medications and NRT with smoking cessation,  
18  
19 controlling for nicotine dependence and sociodemographic variables.  
20  
21  
22

## 23 METHODS

### 24 Data

25  
26 We used data from the 2010-2011 Tobacco Use Supplement to the Current Population  
27  
28 Survey (TUS-CPS), sponsored by the National Cancer Institute and administered by the US  
29  
30 Census Bureau in May 2010, August 2010, and January 2011.[23] The TUS-CPS is administered  
31  
32 as a part of the CPS, which is a monthly national survey of representative households by the US  
33  
34 Census Bureau and the Bureau of Labor Statistics.[24] The TUS-CPS utilizes a multistage  
35  
36 probability sampling of individuals 15 years and older, from a sample of approximately 56,000  
37  
38 housing units, in turn selected from 792 primary sampling units. The average response rate for  
39  
40 CPS for the 3 months of surveys used in this study was 93%, whereas for the TUS it was 63%.  
41  
42  
43  
44  
45  
46  
47

### 48 Measurement

#### 49 *Successful smoking cessation:*

50  
51  
52 Individuals who reported to have smoked at least 100 cigarettes in their entire life but  
53  
54 were not smoking at all at the time of the interview and were a daily smoker one year prior to  
55  
56  
57  
58  
59  
60

1 the interview (“Around this time 12 months ago were you smoking everyday ...?”) were  
2  
3 considered to have successfully quit smoking (n = 1 769). Those who reported to have quit  
4  
5 within the last four weeks were excluded from the analysis (n = 322). Individuals who reported  
6  
7 within the last four weeks were excluded from the analysis (n = 322). Individuals who reported  
8  
9 to have smoked at least 100 cigarettes in their entire life, were smoking every day at the time  
10  
11 of the interview and had made a quit attempt in the past year were considered to have failed in  
12  
13 their quit attempt (n = 7 304). Individuals who reported to have used both prescription  
14  
15 medication and NRT for smoking cessation were excluded from the analysis (n = 488) because  
16  
17 after subdividing this group by categories of duration of use for prescription medication and  
18  
19 NRT, some of the subgroup sample sizes were extremely small. The total sample size for the  
20  
21 study was 8 263 respondents, consisting of 1 379 who successfully quit smoking and 6 884  
22  
23 whose quit attempt was not successful.  
24  
25  
26  
27

28 *Assisted quit attempt and duration of pharmacotherapy use:*  
29

30  
31 Both daily and former smokers were asked in three separate questions to indicate  
32  
33 whether, in their last quit attempt in the past year, they used a prescription pill called (a)  
34  
35 Chantix or varenicline, (b) zyban, bupropion, or wellbutrin, or (b) other prescription pills. They  
36  
37 were also asked in three separate questions to indicate whether, in their last quit attempt in  
38  
39 the past year, they used (a) a nicotine patch, (b) nicotine gum or nicotine lozenge, or (c)  
40  
41 nicotine nasal spray or nicotine inhaler. They were also asked to indicate how many days,  
42  
43 weeks or months they used these prescription and/or NRT medications. Furthermore, both  
44  
45 daily and former smokers were asked three separate questions about use of behavioral  
46  
47 counseling in their last quit attempt in the past year. They were asked if they used a (a)  
48  
49 telephone helpline or quitline, (b) one-on-one counseling or (c) stop smoking clinic, class or  
50  
51  
52  
53  
54  
55  
56  
57  
58  
59  
60

1 support group. Based on the questions about use of prescription medication, NRT and  
2  
3 behavioral counseling, we created the following two categorical variables:  
4

5  
6 Method of quit attempt  
7

- 8 • Prescription medication only
- 9
- 10 • Prescription medication and behavioral counseling
- 11
- 12 • NRT only
- 13
- 14 • NRT and behavioral counseling
- 15
- 16 • Behavioral counseling only
- 17
- 18 • Unassisted
- 19
- 20
- 21
- 22
- 23

24 Duration of use of pharmacotherapy  
25

- 26 • Prescription medication: 5+ weeks
- 27
- 28 • Prescription medication: 3-4 weeks
- 29
- 30 • Prescription medication: 1-2 weeks<sup>1</sup>
- 31
- 32 • NRT: 5+ weeks
- 33
- 34 • NRT: 3-4 weeks
- 35
- 36 • NRT: 1-2 weeks
- 37
- 38 • Behavioral counseling only
- 39
- 40 • Unassisted
- 41
- 42
- 43
- 44
- 45
- 46

47 We categorized duration of use of pharmacotherapy based on a systematic review of  
48 studies assessing adherence to smoking cessation medication.[20] In categorizing duration of  
49 use, we made no distinction between whether or not the medication was combined with  
50 behavioral counseling as this distinction was inconsequential in the analysis.  
51  
52  
53  
54  
55

56  
57 **Statistical analysis**  
58  
59  
60

1 We used multivariable logistic regression models to compute adjusted odds ratios for  
2  
3 the association of the method of quit attempt and duration of use of pharmacotherapy with  
4  
5 successful smoking cessation. Sampling weights were taken into account in the computation of  
6  
7 parameter estimates. We computed  $p$ -values using the jackknife, which is an unbiased  
8  
9 estimator for a statistic and a data-dependent method to calculate standard errors.[25] All  
10  
11 models controlled for daily cigarette consumption (current daily consumption among daily  
12  
13 smokers, and daily consumption 12 months ago among former smokers), age, race/ethnicity,  
14  
15 education, occupation, and family income. In order to account for the missing income data, CPS  
16  
17 uses one of the three imputation methods, relational imputation, longitudinal edits, or hot deck  
18  
19 allocation. Details of these methods are described elsewhere.[26] In multivariable logistic  
20  
21 regression models, we omitted observations that had a missing value for any of the covariates.  
22  
23 This constituted 1.7% of the full sample in the analysis pertaining to the method of quit attempt  
24  
25 (n = 142) and 6.3% of the full sample in the analysis pertaining to duration of pharmacotherapy  
26  
27 use (n = 491). We used the logistic regression results to compute adjusted cessation rates by  
28  
29 method of quit attempt and duration of use of pharmacotherapy. These adjusted rates were  
30  
31 computed by fixing covariates at their means in the fitted models.[27]  
32  
33  
34  
35  
36  
37  
38  
39  
40

## 41 RESULTS

### 42 Sample characteristics and bivariate associations

43  
44  
45  
46  
47  
48  
49  
50  
51  
52  
53  
54  
55  
56  
57  
58  
59  
60

**Table 1. Weighted sample characteristics and unadjusted smoking cessation rates across categories of each covariate**

| Variable                             | % in sample | % quit | p- value |
|--------------------------------------|-------------|--------|----------|
| Method of quit attempt               |             |        | 0.074    |
| Prescription only                    | 10.01       | 18.54  |          |
| Prescription plus behavioral support | 1.14        | 23.8   |          |
| NRT only                             | 18.26       | 14.32  |          |
| NRT plus behavioral support          | 2.54        | 18.98  |          |
| Behavioral only                      | 1.36        | 18.59  |          |
| Unassisted                           | 66.68       | 17.16  |          |
| Duration of pharmacotherapy use      |             |        | <0.001   |
| Prescription: 5+ weeks               | 4.9         | 34.38  |          |
| Prescription: 3-4 weeks              | 1.43        | 16.82  |          |
| Prescription: 1-2 weeks              | 1.89        | 15.28  |          |
| NRT: 5+ weeks                        | 6.04        | 30.65  |          |
| NRT: 3-4 weeks                       | 1.48        | 19.9   |          |
| NRT: 1-2 weeks                       | 13.48       | 7.36   |          |
| Behavioral only                      | 1.42        | 18.59  |          |
| Unassisted                           | 69.36       | 17.16  |          |
| Cigarettes per day                   |             |        | <0.001   |
| 0-9                                  | 24.48       | 15.08  |          |
| 10-14                                | 30.04       | 12.58  |          |
| 15-19                                | 10.31       | 12.58  |          |
| 20-29                                | 29.23       | 21.83  |          |
| 30+                                  | 5.93        | 29.59  |          |
| Sex                                  |             |        | 0.975    |
| Female                               | 50.12       | 16.99  |          |
| Male                                 | 49.88       | 17.02  |          |
| Age                                  |             |        | < 0.001  |
| 18-24                                | 11.79       | 15.32  |          |
| 25-39                                | 33.08       | 18.17  |          |
| 40-54                                | 32.33       | 14.49  |          |
| 55+                                  | 22.8        | 19.77  |          |
| Race/Ethnicity                       |             |        | 0.003    |
| Non-Hispanic White                   | 76.17       | 17.99  |          |
| Non-Hispanic Black                   | 11.34       | 12.98  |          |
| Hispanic                             | 7.39        | 15.73  |          |
| Other                                | 5.09        | 13.15  |          |
| Education                            |             |        | <0.001   |
| Less than high school                | 15.25       | 13.15  |          |
| High school diploma                  | 73.34       | 16.74  |          |
| Bachelor's degree                    | 11.41       | 23.91  |          |
| Occupation                           |             |        | <0.001   |
| Professional                         | 14.33       | 20.99  |          |
| Service                              | 12.31       | 13.96  |          |
| Sales                                | 14.5        | 18.45  |          |
| Farming/construction/production      | 17.28       | 13.08  |          |
| Unemployed                           | 12.01       | 13.81  |          |
| Not in labor force                   | 29.57       | 19.24  |          |
| Family income                        |             |        | <0.001   |
| <\$25,000                            | 36.27       | 13.94  |          |
| \$25,000-\$49,000                    | 31.65       | 17.21  |          |
| \$50,000-\$99,000                    | 23.86       | 19.63  |          |
| \$100,000+                           | 8.23        | 22.17  |          |
| Full sample                          |             | 17.01  |          |

Note: Sample size for each covariate varies from 7 820 to 8 263 depending on the number of missing values for that covariate. P-values are based on chi-square tests.

1 Weighted sample characteristics are shown in Table 1. About 66.7% of the sample  
2 reported to have made an unassisted quit attempt; 10% used only prescription medication;  
3 1.1% used prescription medication plus behavioral counseling; 18.2% used only NRT; 2.5% used  
4 NRT plus behavioral therapy; and 1.3% used only behavioral counseling. When broken down by  
5 duration of use, while most of those who used prescription medication did so for five or more  
6 weeks, the great majority of those who used NRT did so for 2 weeks or less. The reported  
7 number of cigarettes smoked per day was 14 or less for about 54.5% of the sample. Age was  
8 distributed with 11.8% of the sample under 25 years of age, 33% between 25-39 years, 32.3%  
9 between 40-54 years, and 22.8% 55 years or older. The sample was 76% non-Hispanic white,  
10 11.3% non-Hispanic Black, 7.4% Hispanic, and 5% of other race/ethnicity. About 15.2% of the  
11 sample did not have a high school diploma, 73.3% had high school diploma, and 11.4% had at  
12 least a bachelor's degree. The distribution of family income was skewed such that over a third  
13 of the sample had an income of less than \$25 000 and less than a tenth of the sample had an  
14 income of \$100 000 or greater.

15  
16  
17  
18  
19  
20  
21  
22  
23  
24  
25  
26  
27 Table 1 also provides smoking cessation rates across categories of each covariate,  
28 indicating bivariate (unadjusted) associations between the covariates and quitting. Cessation  
29 rate was 17% in the whole sample. There was very little evidence that method of quit attempt  
30 was associated with cessation rate ( $p < 0.074$ ). However, the duration of pharmacotherapy use  
31 ( $p < 0.001$ ), number of cigarettes smoked per day ( $p < 0.001$ ), age ( $p < 0.001$ ), and  
32 race/ethnicity ( $p = 0.003$ ) were all associated with quitting. Higher socioeconomic status as  
33 measured by education, occupation, and income was associated with a higher cessation rate ( $p$   
34  $< 0.001$  for all three indicators of socioeconomic status). Sex had no association with cessation.  
35  
36  
37  
38  
39  
40  
41  
42  
43

#### 44 **Adjusted results from multivariable logistic regression models**

45  
46 Table 2 provides adjusted odds ratios for the association of method of quit attempt with the  
47 probability of smoking cessation. Figure 1 shows the adjusted cessation rates for various  
48 quitting methods. Unlike the unadjusted results in Table 1 which provided very little evidence  
49 of an association between quitting method and successful cessation, the adjusted results  
50  
51  
52  
53  
54  
55  
56  
57  
58  
59  
60

**Table 2. Adjusted<sup>a</sup> odds ratios and 95% confidence intervals (CI) for the association of method of quit attempt and duration of pharmacotherapy use with the probability of successful smoking cessation**

|                                             | OR (95% CI)      | <i>p</i> -value |
|---------------------------------------------|------------------|-----------------|
| Method of quit attempt (n = 8 121)          |                  | 0.025           |
| Prescription only                           | 1.00             |                 |
| Prescription plus behavioral support        | 1.42 (0.76-2.66) |                 |
| NRT only                                    | 0.78 (0.59-1.02) |                 |
| NRT plus behavioral support                 | 1.17 (0.73-1.86) |                 |
| Behavioral only                             | 1.06 (0.57-1.97) |                 |
| Unassisted                                  | 1.09 (0.87-1.37) |                 |
| Duration of pharmacotherapy use (n = 7 772) |                  | < 0.001         |
| Prescription: 5+ weeks                      | 1.00             |                 |
| Prescription: 3-4 weeks                     | 0.42 (0.21-0.84) |                 |
| Prescription: 1-2 weeks                     | 0.38 (0.22-0.66) |                 |
| NRT: 5+ weeks                               | 0.95 (0.67-1.36) |                 |
| NRT: 3-4 weeks                              | 0.53 (0.29-0.97) |                 |
| NRT: 1-2 weeks                              | 0.16 (0.11-0.24) |                 |
| Behavioral only                             | 0.47 (0.25-0.90) |                 |
| Unassisted                                  | 0.48 (0.37-0.64) |                 |

<sup>a</sup> Adjusted for the effect of number of cigarettes smoked per day, sex, age, race/ethnicity, education, occupation, and family income.

Figure 1 here.....

revealed some evidence of an association ( $p = 0.025$ ). The highest cessation rate was among those who used prescription medication and behavioral counseling (20.4%) followed by those who used NRT and behavioral counseling (17.4%), attempted to quit unassisted (16.4%), used behavioral counseling only (16.1%), and those who used prescription medication only (15.3%). The lowest cessation rate was among those who only used NRT as a quitting method (12.3%).

Figure 2 here.....

Table 2 also provides adjusted odds ratios for the association of duration of pharmacotherapy use with the probability of smoking cessation. Figure 2 shows the adjusted cessation rates for various durations of pharmacotherapy use. Consistent with the unadjusted results in Table 1, the adjusted results in Table 2 also provide evidence ( $p < 0.001$ ) of an association between duration of pharmacotherapy use and successful cessation. As shown in Figure 2, cessation rates were highest among those who used prescription medication for 5+ weeks (28.8%) and those who used NRT for 5+ weeks (27.8%). Cessation rates for those who used prescription medication or NRT for less than five weeks varied from 6.2% to 14.5%.



1 Cessation rates for those who used only behavioral counseling and those who attempted to  
2 quit smoking unassisted were 16.1% and 16.4%, respectively.  
3

4 The results pertaining to the association of other covariates with successful cessation  
5 were very similar in the multivariable regression models for method of quit attempt and  
6 duration of pharmacotherapy use. These results were consistent with bivariate associations  
7 reported above, except for the fact that there was very little evidence for an association of  
8 race/ethnicity and smoking cessation in multivariable analyses.  
9  
10  
11  
12  
13

## 14 DISCUSSION

15 This is the first population-based study to examine the association of successful smoking  
16 cessation and duration of use of prescription medication as well as NRT for smoking cessation.  
17 We found that using pharmacotherapy for five weeks or longer is associated with a higher  
18 probability of cessation compared to using pharmacotherapy for shorter durations, only using  
19 behavioral counseling or trying to quit unassisted.  
20  
21  
22  
23  
24  
25  
26  
27

28 Our findings are consistent with the results of a study of a hospital-based cessation  
29 program where participants who used NRT for 5 weeks or longer were found to have a higher  
30 cessation rate at 6-month follow-up.[28] However, our findings are not consistent with those of  
31 a population-based study which did not find any evidence that using NRT for more than 6  
32 weeks versus not using NRT at all was associated with smoking cessation.[12] In that study, the  
33 survey response rate was low, the sample size was small and prescription medications were not  
34 examined. These factors could explain the discrepant findings.  
35  
36  
37  
38  
39  
40

41 While we found that smokers who used pharmacotherapy for at least 5 weeks have a far  
42 more favorable outcome than others, only 11% of the sample was in this group and notably  
43 about 70% of the sample did not use any pharmacotherapy for smoking cessation. Previous  
44 research indicates that barriers to the use of these cessation aids include concerns with their  
45 addictiveness, cost and side effects, as well as the belief that a treatment of any kind is not  
46 needed to quit smoking.[29-31]  
47  
48  
49  
50  
51

52 A major limitation of the study is that there is a strong possibility of reverse causation  
53 such that relapse would determine duration of pharmacotherapy use rather than vice  
54 versa.[35] Smokers who use varenicline to quit smoking are asked to completely stop smoking  
55 one week after their quit date.[36] Thus, individuals who use pharmacotherapies and relapse a  
56  
57  
58  
59  
60

1 short while after a quit attempt may stop using these aids. In such cases, an unsuccessful quit  
2 attempt would cause a short duration of pharmacotherapy use instead of the reverse.  
3  
4 Furthermore, because of its observational nature, our study cannot establish a causal link  
5 between the duration of pharmacotherapy use and successful smoking cessation. While our  
6 analyses controlled for several important predictors of cessation including daily cigarette  
7 consumption, age, race, education, occupation, and income, it is possible that there might be  
8 residual confounding related to variables such as depression, anxiety, alcohol use, and financial  
9 stress.[33, 34] Such confounding would further weaken the ability of the study to imply  
10 causation.  
11  
12

13  
14  
15  
16  
17  
18 Another weakness of the study relates to the fact that smokers forget many quit  
19 attempts [7, 32] and they are more prone to recall attempts that used pharmacotherapy than  
20 those that did not.[14, 17] Such recall bias can underestimate the success rate of attempts at  
21 quitting with the aid of pharmacotherapy.[17]  
22  
23

24  
25 A strength of this study was that it used a large nationally representative sample with a  
26 relatively high response rate. This was the first time that questions about the duration of  
27 pharmacotherapy use were included in the TUS-CPS. We know of no other national data on the  
28 general population that provide information on this variable. Many population-based studies of  
29 pharmacotherapies for smoking cessation have found these aids to be ineffective. It is likely  
30 that if these studies were able to account for duration of use, their findings would have been  
31 different. However, data on duration of use is not routinely collected and it would require a  
32 large sample size to provide a reliable estimate of the effect of using these medications for  
33 duration of a few weeks. Nonetheless, it would likely be an important area for further research  
34 to establish the relationship between duration of use of pharmacotherapy and successful  
35 quitting in the general population.  
36  
37  
38  
39  
40  
41  
42  
43  
44  
45

46 Our results strengthen the findings of clinical trials about the efficacy of  
47 pharmacotherapy for smoking cessation and indicate that these aids might also be successful in  
48 the general population if they are used for at least five weeks.  
49  
50  
51  
52  
53  
54  
55  
56  
57  
58  
59  
60

### CONTRIBUTORSHIP STATEMENT

We assure that all authors included on a paper fulfill the criteria of authorship. All have contributed in the conception and design, analysis and interpretation of data, drafting of the article and revising it critically for important intellectual content, and final approval of the version to be published. In addition we also assure that there is no one else who fulfills the criteria but has not been included as an author. Dr. Mohammad Siahpush was instrumental in conceptualization of research study, data analysis, and writing of the initial draft of the manuscript. Raees Shaikh and Molly McCarthy contributed in the development of study, data analysis, and preparation of the results section. They also helped with writing the manuscript and editing it for final submission. Dr. Asia Sikora helped with literature review, provided inputs for the materials and method section, and contributed to writing and editing the manuscript. Dr. Melissa Tibbits was involved with literature review and data analysis and provided her inputs to the entire manuscript. Dr. Gopal Singh was involved with formulation of research study and helped in the data analysis and contributed in the writing and editing of the final manuscript.

### DETAILS OF FUNDING

This work did not require or receive funding.

### CONFLICT OF INTEREST STATEMENT

All authors have completed the Unified Competing Interest form (available on request from the corresponding author) declare that no support was received from any organization for the submitted work and that there was no financial relationships with any organizations that might have an interest in the submitted work in the previous three years, neither did we have other relationships or activities that could appear to have influenced the submitted work. No competing interests to declare.

### ETHICAL APPROVAL STATEMENT

No ethical approval was required for this work.

### DATA SHARING STATEMENT

No additional data used or available.

### FIGURE LEGENDS

Figure1: Adjusted Cessation Rate by Method of Quit Attempt

Figure2: Adjusted Cessation Rate by Duration of Pharmacotherapy Use

## REFERENCES

- 1 Raupach T, van Schayck C,P. Pharmacotherapy for smoking cessation: current advances and research topics. *CNS Drugs* 2011;**25**(5):371-82.
- 2 Cahill K, Stevens S, Lancaster T. Pharmacological Treatments for Smoking Cessation. *JAMA* 2014;**311**(2):193-4.
- 3 Kasza KA, Hyland AJ, Borland R, et al. Effectiveness of stop-smoking medications: findings from the International Tobacco Control (ITC) Four Country Survey. *Addiction* 2013;**108**(1):193-202.
- 4 West R, Zhou X. Is nicotine replacement therapy for smoking cessation effective in the “real world”? Findings from a prospective multinational cohort study. *Thorax* 2007;**62**(11):998-1002.
- 5 Cummings KM, Fix B, Celestino P, et al. Reach, efficacy, and cost-effectiveness of free nicotine medication giveaway programs. *Journal of Public Health Management and Practice* 2006;**12**(1):37-43.
- 6 Miller N, Frieden TR, Liu SY, et al. Effectiveness of a large-scale distribution programme of free nicotine patches: a prospective evaluation. *Lancet* 2005;**365**:1849-54.
- 7 Shiffman S, Brockwell SE, Pillitteri JL, et al. Use of smoking-cessation treatments in the United States. *American Journal of Preventive Medicine* 2008;**34**(2):102-11.
- 8 Alberg AJ, Patnaik JL, May JW, et al. Nicotine replacement therapy use among a cohort of smokers. *Journal of addictive diseases* 2005;**24**(1):101-13.
- 9 Lee CW, Kahende J. Factors associated with successful smoking cessation in the United States, 2000. *American Journal of Public Health* 2007;**97**(8):1503-9.
- 10 Hagimoto A, Nakamura M, Morita T, et al. Smoking cessation patterns and predictors of quitting smoking among the Japanese general population: a 1-year follow-up study. *Addiction* 2010;**105**(1):164-73.
- 11 Yang J, Hammond D, Driezen P, et al. The use of cessation assistance among smokers from China: Findings from the ITC China Survey. *BMC public health* 2011;**11**(1):75.
- 12 Alpert HR, Connolly GN, Biener L. A prospective cohort study challenging the effectiveness of population-based medical intervention for smoking cessation. *Tobacco control* 2013;**22**(1):32-7.
- 13 Pierce JP, Gilpin EA. Impact of over-the-counter sales on effectiveness of pharmaceutical aids for smoking cessation. *Jama* 2002;**288**(10):1260-4.
- 14 Hughes JR, Peters EN, Naud S. Effectiveness of over-the-counter nicotine replacement therapy: a qualitative review of nonrandomized trials. *Nicotine & tobacco research : official journal of the Society for Research on Nicotine and Tobacco* 2011;**13**(7):512-22.
- 15 Walsh RA. Over-the-counter nicotine replacement therapy: a methodological review of the evidence supporting its effectiveness. *Drug and Alcohol Review* 2008;**27**(5):529-47.

- 1 16 Kotz D, West R. Explaining the social gradient in smoking cessation: it's not in the trying, but in the  
2 succeeding. *Tobacco control* 2009;**18**(1):43-6.  
3
- 4 17 Borland R, Partos TR, Cummings KM. Systematic biases in cross-sectional community studies may  
5 underestimate the effectiveness of stop-smoking medications. *Nicotine & Tobacco Research*  
6 2012;**14**(12):1483-7.  
7
- 8 18 Shiffman S, Di Marino ME, Sweeney CT. Characteristics of selectors of nicotine replacement therapy.  
9 *Tobacco control* 2005;**14**(5):346-55.  
10
- 11 19 Kotz D, Brown J, West R. 'Real-world' effectiveness of smoking cessation treatments: a population  
12 study. *Addiction (Abingdon, England)* 2014;**109**(3):491-9.  
13
- 14 20 Raupach T, Brown J, Herbec A, et al. A systematic review of studies assessing the association between  
15 adherence to smoking cessation medication and treatment success. *Addiction* 2014;**109**(1):35-43.  
16
- 17 21 Shiffman S, Sweeney CT, Ferguson SG, et al. Relationship between adherence to daily nicotine patch  
18 use and treatment efficacy: Secondary analysis of a 10 week randomized, double-blind, placebo-  
19 controlled clinical trial simulating over-the-counter use in adult smokers. *Clinical therapeutics*  
20 2008;**30**(10):1852-8.  
21
- 22 22 Lee JH, Jones PG, Bybee K, et al. A longer course of varenicline therapy improves smoking cessation  
23 rates. *Preventive cardiology* 2008;**11**(4):210-4.  
24
- 25 23 U.S. Department of Commerce, Census Bureau. National Cancer Institute and Centers for Disease  
26 Control and Prevention Co-sponsored Tobacco Use Supplement to the Current Population Survey (2010-  
27 2011). 2012;.  
28
- 29 24 U.S. Census Bureau. Current population survey: Design and methodology. *Technical Paper TP63RV,*  
30 *Bureau of Labor Statistics and US Census Bureau, Washington DC* October 2006;**2014**(February 10).  
31
- 32 25 Gould W. Jackknife estimation. *Stata Technical Bulletin* 1995;**4**(24).  
33
- 34 26 The U.S. Census Bureau. Current Population Survey: Imputation of Unreported Data Items.  
35 2014;**2014**(03/18).  
36
- 37 27 Williams R. Using the margins command to estimate and interpret adjusted predictions and marginal  
38 effects. *Stata Journal* 2012;**12**(2).  
39
- 40 28 Raupach T, Shahab L, Neubert K, et al. Implementing a hospital-based smoking cessation programme:  
41 evidence for a learning effect. *Patient education and counseling* 2008;**70**(2):199-204.  
42
- 43 29 Fu SS, Burgess D, van Ryn M, et al. Views on smoking cessation methods in ethnic minority  
44 communities: a qualitative investigation. *Preventive medicine* 2007;**44**(3):235-40.  
45
- 46 30 Ryan KK, Garrett-Mayer E, Alberg AJ, et al. Predictors of cessation pharmacotherapy use among black  
47 and non-Hispanic white smokers. *Nicotine & tobacco research : official journal of the Society for*  
48 *Research on Nicotine and Tobacco* 2011;**13**(8):646-52.  
49
- 50  
51  
52  
53  
54  
55  
56  
57  
58  
59  
60

- 1 31 Cokkinides VE, Ward E, Jemal A, et al. Under-use of smoking-cessation treatments: results from the  
2 National Health Interview Survey, 2000. *American Journal of Preventive Medicine* 2005;**28**(1):119-22.  
3
- 4 32 Berg CJ, An LC, Kirch M, et al. Failure to report attempts to quit smoking. *Addictive Behaviors*  
5 2010;**35**(10):900-4.  
6
- 7 33 Caponnetto P, Polosa R. Common predictors of smoking cessation in clinical practice. *Respiratory*  
8 *medicine* 2008;**102**(8):1182-92.  
9
- 10 34 Siahpush M, Carlin JB. Financial stress, smoking cessation and relapse: results from a prospective  
11 study of an Australian national sample. *Addiction* 2006;**110**:121-7.  
12
- 13 35 Shiffman S. Use of more nicotine lozenges leads to better success in quitting smoking. *Addiction*  
14 2007;**102**(5):809-14.  
15
- 16 36 Pfizer Inc. Getting started with CHANTIX: Things to Remember. 2014;**2014**(March 2014).  
17  
18  
19  
20  
21  
22  
23  
24  
25  
26  
27  
28  
29  
30  
31  
32  
33  
34  
35  
36  
37  
38  
39  
40  
41  
42  
43  
44  
45  
46  
47  
48  
49  
50  
51  
52  
53  
54  
55  
56  
57  
58  
59  
60

**Association between duration of use of pharmacotherapy and smoking cessation: Findings from a national survey**  
**Effectiveness of pharmacotherapy for smoking cessation in the general population:**  
**Duration of use matters**

Mohammad Siahpush, PhD  
Department of Health Promotion, Social and Behavioral Health  
College of Public Health | University of Nebraska Medical Center  
984365 Nebraska Medical Center | Omaha, NE 68198-4365 | USA

Corresponding author:  
Raees A. Shaikh, MPH  
Department of Health Promotion, Social and Behavioral Health  
College of Public Health | University of Nebraska Medical Center  
984365 Nebraska Medical Center | Omaha, NE 68198-4365 | USA  
Email: raees.shaikh@unmc.edu | Tel: 402-559-1936 | Fax: 402-559-3773

Molly McCarthy, MPH  
Department of Health Promotion, Social and Behavioral Health  
College of Public Health | University of Nebraska Medical Center  
984365 Nebraska Medical Center | Omaha, NE 68198-4365 | USA

Asia Sikora Kessler, PhD  
Department of Health Promotion, Social and Behavioral Health  
College of Public Health | University of Nebraska Medical Center  
984365 Nebraska Medical Center | Omaha, NE 68198-4365 | USA

Melissa Tibbits, PhD  
Department of Health Promotion, Social and Behavioral Health  
College of Public Health | University of Nebraska Medical Center  
984365 Nebraska Medical Center | Omaha, NE 68198-4365 | USA

Gopal K. Singh, Ph.D., M.S., M.Sc.  
U.S. Department of Health & Human Services  
5600 Fishers lane, Room 18-41 | Rockville, MD 20857 | USA

**Word Count:** 2582/2496

**Key Words:** Pharmacotherapy for [Smoking C](#)essation, Duration of Pharmacotherapy [Use](#), Smoking Cessation, Assisted Cessation

Formatted: Highlight

## ABSTRACT

**AimObjective:** To investigate the association of the duration of use of prescription medications and nicotine replacement therapy (NRT) with smoking cessation using a national sample of the general population in the United States, controlling for nicotine dependence and sociodemographic variables.

**Setting:** United States

**Participants:**

**Methods:** We used data from the 2010-2011 Tobacco Use Supplement to the US Current Population Survey. We limited the analysis to current daily smokers who made a quit attempt in the past year and former smokers who were a daily smoker one year prior to the survey (n = 8263). Respondents were asked about duration of use of prescription medication (vVarenicline, bBupropion, other) and NRT (nicotine patch, gum/lozenges, nasal spray, and inhaler) for smoking cessation.

**Primary Outcome Measure:** Successful Smoking Cessation. Individuals who reported to have smoked at least 100 cigarettes in their lifetime but were not smoking at all at the time of the interview and were a daily smoker one year prior to the interview were considered to have successfully quit smoking.

**Results:** After adjusting for daily cigarette consumption and sociodemographic covariates, we found ~~overwhelming~~ evidence ( $p < 0.001$ ) for ~~an~~ association between duration of pharmacotherapy use and smoking cessation ( $p < 0.001$ ). Adjusted cessation rates for those who used prescription medication or NRT for 5+ weeks were 28.8% and 27.8%, respectively. Adjusted cessation rates for those who used prescription medication or NRT for



1  
2  
3  
4  
5  
6  
7 less than five weeks varied from 6.2% to 14.5%. Adjusted cessation rates for those who used  
8 only behavioral counseling and those who attempted to quit smoking unassisted were 16.1%  
9 and 16.4%, respectively.  
10

11  
12 **Conclusion:** ~~Use of pharmacotherapy for smoking cessation for at least five weeks is~~  
13 ~~associated with increased likelihood of successful smoking cessation. can be effective in the~~  
14 ~~general population if used for at least five weeks. Results suggest that encouraging smokers~~  
15 who intend to quit to use pharmacotherapy and to adhere to treatment duration can help  
16 improve chances of a successful cessation.  
17  
18  
19  
20  
21

## 22 ARTICLE SUMMARY

### 23 Strengths and limitations of the study:

- 24  
25  
26  
27  
28  
29  
30  
31  
32  
33  
34  
35  
36  
37  
38  
39  
40  
41  
42  
43  
44  
45  
46  
47  
48  
49  
50  
51  
52  
53  
54  
55  
56  
57  
58  
59  
60
- This was the first population-based study to examine the association between the duration of use of prescription medication as well as NRT for smoking cessation ~~as a~~ predictor of and successful smoking cessation, controlling for nicotine dependence and sociodemographic variables.
  - A strength of this study was that it used a large nationally representative sample with a relatively high response rate.
  - Our results strengthen the findings of clinical trials about the efficacy of pharmacotherapy for smoking cessation and indicate that these aids ~~could~~ might also be effective ~~successful~~ in the general population if they are used for at least five weeks.
  - A strong possibility of reverse causation such that relapse would determine duration of pharmacotherapy use rather than vice versa, was a major limitation of this study. Recall bias, especially related to the smokers previous quit attempts and the observational nature of the study precluding the establishment of a causal link were between the

1  
2  
3  
4  
5  
6  
7 duration of pharmacotherapy use and successful smoking cessation, were the ~~major~~  
8 ~~other~~ limitations. ~~of this study.~~  
9  
10

## 11 12 13 14 15 INTRODUCTION

16  
17 Clinical trials provide strong evidence that pharmacotherapy for smoking cessation  
18 including various forms of nicotine replacement therapies (NRT), ~~b~~upropion, or ~~v~~arenicline  
19 greatly increase the chances of a successful smoking cessation attempt.[1, 2] However,  
20 observational population-based studies have shown mixed results. While some have shown  
21 that pharmacotherapy increases smoking cessation rates,[3-6] others have concluded the  
22 opposite.[7-11] Yet, other population-based studies have shown no difference in cessation  
23 rates between those who use and those who do not use pharmacotherapy.[12, 13] The  
24 population-based reports that have found no favorable effect of pharmacotherapy have been  
25 criticized for not controlling for nicotine dependence,[14-16] which is a predictor of abstinence  
26 and is usually higher among smokers who choose to use pharmacotherapy for smoking  
27 cessation.[4, 14, 17, 18] Some of the analyses that have controlled for nicotine dependence  
28 have found a favorable effect of pharmacotherapy on smoking cessation[3, 4, 19] but others  
29 have not.[7]  
30  
31  
32  
33  
34  
35  
36  
37  
38  
39  
40  
41  
42

43 An additional confounder that rarely is taken into account in population-based studies is  
44 duration of use of pharmacotherapy, which has been found to be associated with treatment  
45 success in clinical trials.[20-22] We know of one population-based study which examined the  
46 association of duration of use of pharmacotherapy with smoking cessation and found no  
47 association.[12] This study was conducted in the US where NRT can be purchased over the  
48  
49  
50  
51  
52

1  
2  
3  
4  
5  
6  
7 counter and medications such as [bBupropion](#) and [vVarenicline](#) can only be obtained as  
8  
9 prescription drugs.

10  
11 While clinical trials have high internal validity and can provide evidence for the efficacy  
12 of pharmacotherapy, observational population-based studies can address effectiveness of these  
13 therapies under conditions that they are intended to be used.[14] Furthermore, while clinical  
14 trials provide confidence in causal associations, population-based studies are strong in  
15 representativeness and external validity. Thus, both are needed to advance the science of  
16 smoking cessation.[19]

17  
18 There is no literature on population-based studies that examine the association of  
19 duration of NRT and prescription medication use with smoking cessation. Our aim was to use a  
20 large representative sample of the general population in the United States and investigate the  
21 association of the duration of use of prescription medications and NRT with smoking cessation,  
22 controlling for nicotine dependence and sociodemographic variables.

## 23 24 25 26 27 28 29 30 31 32 33 **METHODS**

### 34 35 **Data**

36  
37 We used data from the 2010-2011 Tobacco Use Supplement to the Current Population  
38 Survey (TUS-CPS), sponsored by the National Cancer Institute and administered by the US  
39 Census Bureau in May 2010, August 2010, and January 2011.[23] The TUS-CPS is administered  
40 as a part of the CPS, which is a monthly national survey of representative households by the US  
41 Census Bureau and the Bureau of Labor Statistics.[24] The TUS-CPS utilizes a multistage  
42 probability sampling of individuals 15 years and older, from a sample of approximately 56,000  
43 housing units, in turn selected from 792 primary sampling units. The average response rate for  
44 CPS for the 3 months of surveys used in this study was 93%, whereas for the TUS it was 63%.

## Measurements

### *Successful smoking cessation:*

Individuals who reported to have smoked at least 100 cigarettes in their entire life but were not smoking at all at the time of the interview [and were a daily smoker one year prior to the interview](#) (“Around this time 12 months ago were you smoking everyday ...?”) were considered to have successfully quit smoking (n = 1 769). Those who reported to have quit within the last four weeks were excluded from the analysis (n = 322). Individuals who reported to have smoked at least 100 cigarettes in their entire life, were smoking every day at the time of the interview and had made a quit attempt in the past year were considered to have failed in their quit attempt (n = 7 304). Individuals who reported to have used both prescription medication and NRT for smoking cessation were excluded from the analysis (n = 488) because after subdividing this group by categories of duration of use for prescription medication and NRT, some of the subgroup sample sizes were extremely small. The total sample size for the study was 8 263 respondents, consisting of 1 379 who successfully quit smoking and 6 884 whose quit attempt was not successful.

### *Assisted quit attempt and duration of pharmacotherapy use:*

Both daily and former smokers were asked in three separate questions to indicate whether, in their last quit attempt in the past year, they used a prescription pill called (a) Chantix or ~~Varenicline~~[varenicline](#), (b) ~~z~~[Zyban](#), ~~b~~[Bupropion](#), or ~~w~~[Wellbutrin](#), or (b) other prescription pills. They were also asked in three separate questions to indicate whether, in their last quit attempt [in the past year](#), they used (a) a nicotine patch, (b) nicotine gum or nicotine lozenge, or (c) nicotine nasal spray or nicotine inhaler. They were also asked to indicate how many days, weeks or months they used these prescription and/or NRT medications.

1  
2  
3  
4  
5  
6  
7 Furthermore, both daily and former smokers were asked three separate questions about use of  
8 behavioral counseling in their last quit attempt in the past year. They were asked if they used a  
9 (a) telephone helpline or quitline, (b) one-on-one counseling or (c) stop smoking clinic, class or  
10 support group. Based on the questions about use of prescription medication, NRT and  
11 behavioral counseling, we created the following two categorical variables:  
12  
13  
14  
15

16  
17 Method of quit attempt

- 18 • Prescription medication only
- 19 • Prescription medication and behavioral counseling
- 20 • NRT only
- 21 • NRT and behavioral counseling
- 22 • Behavioral counseling only
- 23 • Unassisted

24  
25  
26  
27  
28  
29  
30  
31 Duration of use of pharmacotherapy

- 32 • Prescription medication: 5+ weeks
- 33 • Prescription medication: 3-4 weeks
- 34 • Prescription medication: 1-2 weeks<sup>1</sup>
- 35 • NRT: 5+ weeks
- 36 • NRT: 3-4 weeks
- 37 • NRT: 1-2 weeks
- 38 • Behavioral counseling only
- 39 • Unassisted

40  
41  
42  
43  
44  
45  
46  
47  
48  
49 We categorized duration of use of pharmacotherapy based on a systematic review of  
50 studies assessing adherence to smoking cessation medication.[20] In categorizing duration of  
51  
52

1  
2  
3  
4  
5  
6  
7  
8  
9  
10  
11  
12  
13  
14  
15  
16  
17  
18  
19  
20  
21  
22  
23  
24  
25  
26  
27  
28  
29  
30  
31  
32  
33  
34  
35  
36  
37  
38  
39  
40  
41  
42  
43  
44  
45  
46  
47  
48  
49  
50  
51  
52  
53  
54  
55  
56  
57  
58  
59  
60

use, we made no distinction between whether or not the medication was combined with behavioral counseling as this distinction was inconsequential in the analysis.

### Statistical analysis

We used multivariable logistic regression models to compute adjusted odds ratios for the association of the method of quit attempt and duration of use of pharmacotherapy with successful smoking cessation. Sampling weights were taken into account in the computation of parameter estimates. We computed *p*-values using the jackknife, which is an unbiased estimator for a statistic and a data-dependent method to calculate standard errors.[25] All models controlled for daily cigarette consumption (current daily consumption among daily smokers, and daily consumption 12 months ago among former smokers), age, race/ethnicity, education, occupation, and family income. In order to account for the missing income data, CPS uses one of the three imputation methods, relational imputation, longitudinal edits, or hot deck allocation. Details of these methods are described elsewhere.[26] In multivariable logistic regression models, we omitted observations that had a missing value for any of the covariates. This constituted 1.7% of the full sample in the analysis pertaining to the method of quit attempt (*n* = 142) and 6.3% of the full sample in the analysis pertaining to duration of pharmacotherapy use (*n* = 491). We used the logistic regression results to compute adjusted cessation rates by method of quit attempt and duration of use of pharmacotherapy. These adjusted rates were computed by fixing covariates at their means in the fitted models.[27]

## RESULTS

### Sample characteristics and bivariate associations

**Table 1. Weighted sample characteristics and unadjusted smoking cessation rates across categories of each covariate**

| Variable                             | % in sample | % quit | p- value |
|--------------------------------------|-------------|--------|----------|
| Method of quit attempt               |             |        | 0.074    |
| Prescription only                    | 10.01       | 18.54  |          |
| Prescription plus behavioral support | 1.14        | 23.8   |          |
| NRT only                             | 18.26       | 14.32  |          |
| NRT plus behavioral support          | 2.54        | 18.98  |          |
| Behavioral only                      | 1.36        | 18.59  |          |
| Unassisted                           | 66.68       | 17.16  |          |
| Duration of pharmacotherapy use      |             |        | <0.001   |
| Prescription: 5+ weeks               | 4.9         | 34.38  |          |
| Prescription: 3-4 weeks              | 1.43        | 16.82  |          |
| Prescription: 1-2 weeks              | 1.89        | 15.28  |          |
| NRT: 5+ weeks                        | 6.04        | 30.65  |          |
| NRT: 3-4 weeks                       | 1.48        | 19.9   |          |
| NRT: 1-2 weeks                       | 13.48       | 7.36   |          |
| Behavioral only                      | 1.42        | 18.59  |          |
| Unassisted                           | 69.36       | 17.16  |          |
| Cigarettes per day                   |             |        | <0.001   |
| 0-9                                  | 24.48       | 15.08  |          |
| 10-14                                | 30.04       | 12.58  |          |
| 15-19                                | 10.31       | 12.58  |          |
| 20-29                                | 29.23       | 21.83  |          |
| 30+                                  | 5.93        | 29.59  |          |
| Sex                                  |             |        | 0.975    |
| Female                               | 50.12       | 16.99  |          |
| Male                                 | 49.88       | 17.02  |          |
| Age                                  |             |        | < 0.001  |
| 18-24                                | 11.79       | 15.32  |          |
| 25-39                                | 33.08       | 18.17  |          |
| 40-54                                | 32.33       | 14.49  |          |
| 55+                                  | 22.8        | 19.77  |          |
| Race/Ethnicity                       |             |        | 0.003    |
| Non-Hispanic White                   | 76.17       | 17.99  |          |
| Non-Hispanic Black                   | 11.34       | 12.98  |          |
| Hispanic                             | 7.39        | 15.73  |          |
| Other                                | 5.09        | 13.15  |          |
| Education                            |             |        | <0.001   |
| Less than high school                | 15.25       | 13.15  |          |
| High school diploma                  | 73.34       | 16.74  |          |
| Bachelor's degree                    | 11.41       | 23.91  |          |
| Occupation                           |             |        | <0.001   |
| Professional                         | 14.33       | 20.99  |          |
| Service                              | 12.31       | 13.96  |          |
| Sales                                | 14.5        | 18.45  |          |
| Farming/construction/production      | 17.28       | 13.08  |          |
| Unemployed                           | 12.01       | 13.81  |          |
| Not in labor force                   | 29.57       | 19.24  |          |
| Family income                        |             |        | <0.001   |

|                   |       |       |
|-------------------|-------|-------|
| <\$25,000         | 36.27 | 13.94 |
| \$25,000-\$49,000 | 31.65 | 17.21 |
| \$50,000-\$99,000 | 23.86 | 19.63 |
| \$100,000+        | 8.23  | 22.17 |
| Full sample       |       | 17.01 |

Note: Sample size for each covariate varies from 7 820 to 8 263 depending on the number of missing values for that covariate. [P-values are based on chi-square tests.](#)

Formatted: Font: (Default) Calibri, Italic

Weighted sample characteristics are shown in Table 1. About 66.7% of the sample reported to have made an unassisted quit attempt; 10% used only prescription medication; 1.1% used prescription medication plus behavioral counseling; 18.2% used only NRT; 2.5% used NRT plus behavioral therapy; and 1.3% used only behavioral counseling. When broken down by duration of use, while most of those who used prescription medication did so for five or more weeks, the great majority of those who used NRT did so for 2 weeks or less. The reported number of cigarettes smoked per day was 14 or less for about 54.5% of the sample. Age was distributed with 11.8% of the sample under 25 years of age, 33% between 25-39 years, 32.3% between 40-54 years, and 22.8% 55 years or older. The sample was 76% non-Hispanic white, 11.3% non-Hispanic Black, 7.4% Hispanic, and 5% of other race/ethnicity. About 15.2% of the sample did not have a high school diploma, 73.3% had high school diploma, and 11.4% had at least a bachelor's degree. The distribution of family income was skewed such that over a third of the sample had an income of less than \$25 000 and less than a tenth of the sample had an income of \$100 000 or greater.

Table 1 also provides smoking cessation rates across categories of each covariate, indicating bivariate (unadjusted) associations between the covariates and quitting. Cessation rate was 17% in the whole sample. There was very little evidence that method of quit attempt was associated with cessation rate ( $p < 0.074$ ). However, ~~there was overwhelming evidence that the~~ duration of pharmacotherapy use ~~was associated with quitting~~ ( $p < 0.001$ ), ~~such that the use of prescription medication or NRT for 5+ weeks was associated with remarkably higher cessation rates compared to the use of these products for shorter durations, behavioral counseling or unassisted quit attempts.~~ ~~n~~—Number of cigarettes smoked per day had a curvilinear relationship with cessation such that those who smoked 0-9 cigarettes and those who smoked 20+ cigarettes per day had a higher cessation rate than others ( $p < 0.001$ ), ~~a~~—Age had a curvilinear relationship with cessation in that individuals in the 25-39 and 55+ age categories had notably higher cessation rates than others ( $p < 0.001$ ), ~~and~~ ~~ra~~—Race/ethnicity ( $p = 0.003$ ) ~~werewas~~ all associated with quitting. ~~such that Non-Hispanic Whites had the highest~~

Formatted: Font: (Default) Calibri, Italic



and non-Hispanic Blacks had the lowest cessation rates ( $p = 0.003$ ). Higher socioeconomic status as measured by education, occupation, and income was associated with a higher cessation rate ( $p < 0.001$  for all three indicators of socioeconomic status). Sex had no association with cessation.

**Adjusted results from multivariable logistic regression models**

Table 2 provides adjusted odds ratios for the association of method of quit attempt with the probability of smoking cessation. Figure 1 shows the adjusted cessation rates for various quitting methods. Unlike the unadjusted results in Table 1 which provided very little evidence of an association between quitting method and successful cessation, the adjusted results

**Table 2. Adjusted<sup>a</sup> odds ratios and 95% confidence intervals (CI) for the association of method of quit attempt and duration of pharmacotherapy use with the probability of successful smoking cessation**

|                                             | OR (95% CI)      | p-value          |
|---------------------------------------------|------------------|------------------|
| Method of quit attempt (n = 8 121)          |                  |                  |
| Prescription only                           | 1.00             | 0.025            |
| Prescription plus behavioral support        | 1.42 (0.76-2.66) | <u>0.277</u>     |
| NRT only                                    | 0.78 (0.59-1.02) | <u>0.072</u>     |
| NRT plus behavioral support                 | 1.17 (0.73-1.86) | <u>0.513</u>     |
| Behavioral only                             | 1.06 (0.57-1.97) | <u>0.844</u>     |
| Unassisted                                  | 1.09 (0.87-1.37) | <u>0.464</u>     |
| Duration of pharmacotherapy use (n = 7 772) |                  |                  |
| Prescription: 5+ weeks                      | 1.00             | < 0.001          |
| Prescription: 3-4 weeks                     | 0.42 (0.21-0.84) | <u>0.014</u>     |
| Prescription: 1-2 weeks                     | 0.38 (0.22-0.66) | <u>0.001</u>     |
| NRT: 5+ weeks                               | 0.95 (0.67-1.36) | <u>0.786</u>     |
| NRT: 3-4 weeks                              | 0.53 (0.29-0.97) | <u>0.040</u>     |
| NRT: 1-2 weeks                              | 0.16 (0.11-0.24) | <u>&lt;0.001</u> |
| Behavioral only                             | 0.47 (0.25-0.90) | <u>0.022</u>     |
| Unassisted                                  | 0.48 (0.37-0.64) | <u>&lt;0.001</u> |

<sup>a</sup> Adjusted for the effect of number of cigarettes smoked per day, sex, age, race/ethnicity, education, occupation, and family income.

Figure 1 here.....

Table 2 provides adjusted odds ratios for the association of method of quit attempt with the probability of smoking cessation. Figure 1 shows the adjusted cessation rates for various quitting methods. Unlike the unadjusted results in Table 1 which provided very little evidence

Formatted: Line spacing: 1.5 lines

Formatted: Left, Line spacing: 1.5 lines

Formatted: Font: Not Bold

Formatted: Indent: First line: 0"

1  
2  
3  
4  
5  
6  
7 ~~of an association between quitting method and successful cessation, the adjusted results~~  
8 revealed some evidence of an association ( $p = 0.025$ ). The highest cessation rate was among  
9 those who used prescription medication and behavioral counseling (20.4%) followed by those  
10 who used NRT and behavioral counseling (17.4%), attempted to quit unassisted (16.4%), used  
11 behavioral counseling only (16.1%), and those who used prescription medication only (15.3%).  
12  
13 The lowest cessation rate was among those who only used NRT as a quitting method (12.3%).  
14

15  
16  
17  
18 Figure 2 here.....

Formatted: Font: Not Bold

19  
20 Table 2 also provides adjusted odds ratios for the association of duration of  
21 pharmacotherapy use with the probability of smoking cessation. Figure 2 shows the adjusted  
22 cessation rates for various durations of pharmacotherapy use. Consistent with the unadjusted  
23 results in Table 1, the adjusted results [in Table 2 also](#) provide **strong** evidence ( $p < 0.001$ ) of an  
24 association between duration of pharmacotherapy use and successful cessation. [As shown in](#)  
25 [Figure 2, cessation rates were highest among those who used prescription medication for 5+](#)  
26 [weeks \(28.8%\) and those who used or NRT for 5+ weeks \(27.8%\) had higher cessation rates,](#)  
27 [28.8% and 27.8% respectively, than others.](#) Cessation rates for those who used prescription  
28 medication or NRT for less than five weeks varied from 6.2% to 14.5%. Cessation rates for those  
29 who used only behavioral counseling and those who attempted to quit smoking unassisted  
30 were 16.1% and 16.4%, respectively.  
31

32  
33 The results pertaining to the association of other covariates with successful cessation  
34 were very similar in the multivariable regression models for method of quit attempt and  
35 duration of pharmacotherapy use. These results were consistent with bivariate associations  
36 reported above, except for the fact that there was very little evidence for an association of  
37 race/ethnicity and smoking cessation in multivariable analyses.  
38  
39

## 40 41 42 43 44 45 DISCUSSION

46  
47 This is the first population-based study to examine the [association of successful smoking](#)  
48 [cessation and](#) duration of use of prescription medication as well as NRT for smoking cessation  
49 [as a predictor of successful smoking cessation.](#) We found that using pharmacotherapy for five  
50 weeks or longer is associated with a **remarkably** higher probability of cessation compared to  
51  
52

1  
2  
3  
4  
5  
6  
7 using pharmacotherapy for shorter durations, only using behavioral counseling or trying to quit  
8 unassisted.  
9

10 Our findings are consistent with the results of a study of a hospital-based cessation  
11 program where participants who used NRT for 5 weeks or longer were found to have a higher  
12 cessation rate at 6-month follow-up.[28] However, our findings are not consistent with those of  
13 a population-based study which did not find any evidence that using NRT for more than 6  
14 weeks versus not using NRT at all was associated with smoking cessation.[12] In that study, the  
15 survey response rate was low, the sample size was small and prescription medications were not  
16 examined. These factors could explain the discrepant findings.  
17  
18  
19

20 While we found that smokers who used pharmacotherapy for at least 5 weeks have a far  
21 more favorable outcome than others, only 11% of the sample was in this group and notably  
22 about 70% of the sample did not use any pharmacotherapy for smoking cessation. Previous  
23 research indicates that barriers to the use of these cessation aids include concerns with their  
24 addictiveness, cost and side effects, as well as the belief that a treatment of any kind is not  
25 needed to quit smoking.[29-31]  
26  
27  
28

29 A major weakness/limitation of the study is that there is a strong possibility of reverse  
30 causation such that relapse would determine duration of pharmacotherapy use rather than vice  
31 versa.[35] Smokers who use varenicline to quit smoking are asked to completely stop smoking  
32 one week after their quit date.[36] Thus, individuals who use pharmacotherapies and relapse a  
33 short while after a quit attempt may stop using these aids. In such cases, an unsuccessful quit  
34 attempt would cause a short duration of pharmacotherapy use instead of the reverse.  
35 Furthermore, because of its observational nature, our study cannot establish a causal link  
36 between the duration of pharmacotherapy use and successful smoking cessation. While our  
37 analyses controlled for several important predictors of cessation including daily cigarette  
38 consumption, age, race, education, occupation, and income, it is possible that there might be  
39 residual confounding related to variables such as depression, anxiety, alcohol use, and financial  
40 stress.[33, 34] Such confounding would further weaken the ability of the study to imply  
41 causation.  
42  
43  
44  
45  
46  
47  
48

49 Another-weakness of the study relates to the fact that smokers forget many quit  
50 attempts [7, 32] and they are more prone to recall attempts that used pharmacotherapy than  
51 those that did not.[14, 17] Such recall bias can underestimate the success rate of attempts at  
52  
53  
54

1  
2  
3  
4  
5  
6  
7  
8  
9  
10  
11  
12  
13  
14  
15  
16  
17  
18  
19  
20  
21  
22  
23  
24  
25  
26  
27  
28  
29  
30  
31  
32  
33  
34  
35  
36  
37  
38  
39  
40  
41  
42  
43  
44  
45  
46  
47  
48  
49  
50  
51  
52  
53  
54  
55  
56  
57  
58  
59  
60

quitting with the aid of pharmacotherapy.[17] ~~Another limitation of the study is that because of its observational nature, our study cannot establish a causal link between the duration of pharmacotherapy use and successful smoking cessation. While our analyses controlled for several important predictors of cessation including daily cigarette consumption, age, race, education, occupation, and income, it is possible that there is residual confounding related to variables such as depression, anxiety, alcohol use, and financial stress.[33, 34] Such confounding would further weaken the ability of the study to imply causation. Moreover, there is a possibility of reverse causation such that relapse would determine duration of pharmacotherapy use rather than vice versa.[35] Smokers who use Varenicline to quit smoking are asked to completely stop smoking one week after their quit date.[36] Thus, individuals who use pharmacotherapies and relapse a short while after a quit attempt may stop using these aids. In such cases, an unsuccessful quit attempt would cause a short duration of pharmacotherapy use instead of the reverse.~~

A strength of this study was that it used a large nationally representative sample with a relatively high response rate. This was the first time that questions about the duration of pharmacotherapy use were included in the TUS-CPS. We know of no other national data on the general population that provide information on this variable. Many population-based studies of pharmacotherapies for smoking cessation have found these aids to be ineffective. It is likely that if these studies were able to account for duration of use, their findings would have been different. However, data on duration of use is not routinely collected and it would require a large sample size to provide a reliable estimate of the effect of using these medications for duration of a few weeks. Nonetheless, it would likely be an important area for further research to establish the relationship between duration of use of pharmacotherapy and successful quitting in the general population.

Our results strengthen the findings of clinical trials about the efficacy of pharmacotherapy for smoking cessation and indicate that these aids ~~can~~might also be ~~effective~~successful in the general population if they are used for at least five weeks. ~~Smokers who intend to quit should be encouraged to use pharmacotherapy and adhere to their recommended duration of use.~~

1  
2  
3  
4  
5  
6  
7  
8  
9  
10  
11  
12  
13  
14  
15  
16  
17  
18  
19  
20  
21  
22  
23  
24  
25  
26  
27  
28  
29  
30  
31  
32  
33  
34  
35  
36  
37  
38  
39  
40  
41  
42  
43  
44  
45  
46  
47  
48  
49  
50  
51  
52  
53  
54  
55  
56  
57  
58  
59  
60

#### **CONTRIBUTORSHIP STATEMENT**

We assure that all authors included on a paper fulfill the criteria of authorship. All have contributed in the conception and design, analysis and interpretation of data, drafting of the article and revising it critically for important intellectual content, and final approval of the version to be published. In addition we also assure that there is no one else who fulfills the criteria but has not been included as an author. Dr. Mohammad Siahpush was instrumental in conceptualization of research study, data analysis, and writing of the initial draft of the manuscript. Raees Shaikh and Molly McCarthy contributed in the development of study, data analysis, and preparation of the results section. They also helped with writing the manuscript and editing it for final submission. Dr. Asia Sikora helped with literature review, provided inputs for the materials and method section, and contributed to writing and editing the manuscript. Dr. Melissa Tibbits was involved with literature review and data analysis and provided her inputs to the entire manuscript. Dr. Gopal Singh was involved with formulation of research study and helped in the data analysis and contributed in the writing and editing of the final manuscript.

#### **DETAILS OF FUNDING**

This work did not require or receive funding.

#### **CONFLICT OF INTEREST STATEMENT**

All authors have completed the Unified Competing Interest form (available on request from the corresponding author) declare that no support was received from any organization for the submitted work and that there was no financial relationships with any organizations that might have an interest in the submitted work in the previous three years, neither did we have other relationships or activities that could appear to have influenced the submitted work. No competing interests to declare.

#### **ETHICAL APPROVAL STATEMENT**

No ethical approval was required for this work.

#### **DATA SHARING STATEMENT**

No additional data used or available.

#### **FIGURE LEGENDS**

15

1  
2  
3  
4  
5  
6  
7  
8  
9  
10  
11  
12  
13  
14  
15  
16  
17  
18  
19  
20  
21  
22  
23  
24  
25  
26  
27  
28  
29  
30  
31  
32  
33  
34  
35  
36  
37  
38  
39  
40  
41  
42  
43  
44  
45  
46  
47  
48  
49  
50  
51  
52  
53  
54  
55  
56  
57  
58  
59  
60

Figure1: Adjusted Cessation Rate by Method of Quit Attempt

Figure2: Adjusted Cessation Rate by Duration of Pharmacotherapy Use

## REFERENCES

- 1 Raupach T, van Schayck C,P. Pharmacotherapy for smoking cessation: current advances and research topics. *CNS Drugs* 2011;**25**(5):371-82.
- 2 Cahill K, Stevens S, Lancaster T. Pharmacological Treatments for Smoking Cessation. *JAMA* 2014;**311**(2):193-4.
- 3 Kasza KA, Hyland AJ, Borland R, et al. Effectiveness of stop-smoking medications: findings from the International Tobacco Control (ITC) Four Country Survey. *Addiction* 2013;**108**(1):193-202.
- 4 West R, Zhou X. Is nicotine replacement therapy for smoking cessation effective in the “real world”? Findings from a prospective multinational cohort study. *Thorax* 2007;**62**(11):998-1002.
- 5 Cummings KM, Fix B, Celestino P, et al. Reach, efficacy, and cost-effectiveness of free nicotine medication giveaway programs. *Journal of Public Health Management and Practice* 2006;**12**(1):37-43.
- 6 Miller N, Frieden TR, Liu SY, et al. Effectiveness of a large-scale distribution programme of free nicotine patches: a prospective evaluation. *Lancet* 2005;**365**:1849-54.
- 7 Shiffman S, Brockwell SE, Pillitteri JL, et al. Use of smoking-cessation treatments in the United States. *American Journal of Preventive Medicine* 2008;**34**(2):102-11.
- 8 Alberg AJ, Patnaik JL, May JW, et al. Nicotine replacement therapy use among a cohort of smokers. *Journal of addictive diseases* 2005;**24**(1):101-13.
- 9 Lee CW, Kahende J. Factors associated with successful smoking cessation in the United States, 2000. *American Journal of Public Health* 2007;**97**(8):1503-9.
- 10 Hagimoto A, Nakamura M, Morita T, et al. Smoking cessation patterns and predictors of quitting smoking among the Japanese general population: a 1-year follow-up study. *Addiction* 2010;**105**(1):164-73.
- 11 Yang J, Hammond D, Driezen P, et al. The use of cessation assistance among smokers from China: Findings from the ITC China Survey. *BMC public health* 2011;**11**(1):75.
- 12 Alpert HR, Connolly GN, Biener L. A prospective cohort study challenging the effectiveness of population-based medical intervention for smoking cessation. *Tobacco control* 2013;**22**(1):32-7.

- 1  
2  
3  
4  
5  
6  
7 13 Pierce JP, Gilpin EA. Impact of over-the-counter sales on effectiveness of pharmaceutical aids for  
8 smoking cessation. *Jama* 2002;**288**(10):1260-4.  
9  
10 14 Hughes JR, Peters EN, Naud S. Effectiveness of over-the-counter nicotine replacement therapy: a  
11 qualitative review of nonrandomized trials. *Nicotine & tobacco research : official journal of the Society  
12 for Research on Nicotine and Tobacco* 2011;**13**(7):512-22.  
13  
14 15 Walsh RA. Over-the-counter nicotine replacement therapy: a methodological review of the evidence  
15 supporting its effectiveness. *Drug and Alcohol Review* 2008;**27**(5):529-47.  
16  
17 16 Kotz D, West R. Explaining the social gradient in smoking cessation: it's not in the trying, but in the  
18 succeeding. *Tobacco control* 2009;**18**(1):43-6.  
19  
20 17 Borland R, Partos TR, Cummings KM. Systematic biases in cross-sectional community studies may  
21 underestimate the effectiveness of stop-smoking medications. *Nicotine & Tobacco Research*  
22 2012;**14**(12):1483-7.  
23  
24 18 Shiffman S, Di Marino ME, Sweeney CT. Characteristics of selectors of nicotine replacement therapy.  
25 *Tobacco control* 2005;**14**(5):346-55.  
26  
27 19 Kotz D, Brown J, West R. 'Real-world' effectiveness of smoking cessation treatments: a population  
28 study. *Addiction (Abingdon, England)* 2014;**109**(3):491-9.  
29  
30 20 Raupach T, Brown J, Herbec A, et al. A systematic review of studies assessing the association between  
31 adherence to smoking cessation medication and treatment success. *Addiction* 2014;**109**(1):35-43.  
32  
33 21 Shiffman S, Sweeney CT, Ferguson SG, et al. Relationship between adherence to daily nicotine patch  
34 use and treatment efficacy: Secondary analysis of a 10 week randomized, double-blind, placebo-  
35 controlled clinical trial simulating over-the-counter use in adult smokers. *Clinical therapeutics*  
36 2008;**30**(10):1852-8.  
37  
38 22 Lee JH, Jones PG, Bybee K, et al. A longer course of varenicline therapy improves smoking cessation  
39 rates. *Preventive cardiology* 2008;**11**(4):210-4.  
40  
41 23 U.S. Department of Commerce, Census Bureau. National Cancer Institute and Centers for Disease  
42 Control and Prevention Co-sponsored Tobacco Use Supplement to the Current Population Survey (2010-  
43 2011). 2012;.  
44  
45 24 U.S. Census Bureau. Current population survey: Design and methodology. *Technical Paper TP63RV,  
46 Bureau of Labor Statistics and US Census Bureau, Washington DC* October 2006;**2014**(February 10).  
47  
48 25 Gould W. Jackknife estimation. *Stata Technical Bulletin* 1995;**4**(24).  
49  
50 26 The U.S. Census Bureau. Current Population Survey: Imputation of Unreported Data Items.  
51 2014;**2014**(03/18).  
52  
53 27 Williams R. Using the margins command to estimate and interpret adjusted predictions and marginal  
54 effects. *Stata Journal* 2012;**12**(2).  
55  
56  
57  
58  
59  
60

1  
2  
3  
4  
5  
6  
7  
8  
9  
10  
11  
12  
13  
14  
15  
16  
17  
18  
19  
20  
21  
22  
23  
24  
25  
26  
27  
28  
29  
30  
31  
32  
33  
34  
35  
36  
37  
38  
39  
40  
41  
42  
43  
44  
45  
46  
47  
48  
49  
50  
51  
52  
53  
54  
55  
56  
57  
58  
59  
60

28 Raupach T, Shahab L, Neubert K, et al. Implementing a hospital-based smoking cessation programme: evidence for a learning effect. *Patient education and counseling* 2008;**70**(2):199-204.

29 Fu SS, Burgess D, van Ryn M, et al. Views on smoking cessation methods in ethnic minority communities: a qualitative investigation. *Preventive medicine* 2007;**44**(3):235-40.

30 Ryan KK, Garrett-Mayer E, Alberg AJ, et al. Predictors of cessation pharmacotherapy use among black and non-Hispanic white smokers. *Nicotine & tobacco research : official journal of the Society for Research on Nicotine and Tobacco* 2011;**13**(8):646-52.

31 Cokkinides VE, Ward E, Jemal A, et al. Under-use of smoking-cessation treatments: results from the National Health Interview Survey, 2000. *American Journal of Preventive Medicine* 2005;**28**(1):119-22.

32 Berg CJ, An LC, Kirch M, et al. Failure to report attempts to quit smoking. *Addictive Behaviors* 2010;**35**(10):900-4.

33 Caponnetto P, Polosa R. Common predictors of smoking cessation in clinical practice. *Respiratory medicine* 2008;**102**(8):1182-92.

34 Siahpush M, Carlin JB. Financial stress, smoking cessation and relapse: results from a prospective study of an Australian national sample. *Addiction* 2006;**110**:121-7.

35 Shiffman S. Use of more nicotine lozenges leads to better success in quitting smoking. *Addiction* 2007;**102**(5):809-14.

36 Pfizer Inc. Getting started with CHANTIX: Things to Remember. 2014;**2014**(March 2014).



1  
2  
3  
4  
5  
6  
7  
8  
9  
10  
11  
12  
13  
14  
15  
16  
17  
18  
19  
20  
21  
22  
23  
24  
25  
26  
27  
28  
29  
30  
31  
32  
33  
34  
35  
36  
37  
38  
39  
40  
41  
42  
43  
44  
45  
46  
47  
48  
49  
50  
51  
52  
53  
54  
55  
56  
57  
58  
59  
60



Figure1- Adjusted Cessation Rate by Method of Quit Attempt  
105x76mm (300 x 300 DPI)

View only

1  
2  
3  
4  
5  
6  
7  
8  
9  
10  
11  
12  
13  
14  
15  
16  
17  
18  
19  
20  
21  
22  
23  
24  
25  
26  
27  
28  
29  
30  
31  
32  
33  
34  
35  
36  
37  
38  
39  
40  
41  
42  
43  
44  
45  
46  
47  
48  
49  
50  
51  
52  
53  
54  
55  
56  
57  
58  
59  
60



Figure2- Adjusted Cessation Rate by Duration of Pharmacotherapy Use  
105x76mm (300 x 300 DPI)

view only

## STROBE Statement Checklist

|                               | Checklist |
|-------------------------------|-----------|
| <b>Title and abstract</b>     | Yes       |
| <b>Introduction</b>           |           |
| Background/rationale          | Yes       |
| Objectives/Aims               | Yes       |
| <b>Methods</b>                |           |
| Data sources                  | Yes       |
| Measurement                   | Yes       |
| Statistical methods           | Yes       |
| <b>Results</b>                |           |
| Descriptive data              | Yes       |
| Main results                  | Yes       |
| <b>Discussion</b>             |           |
| Key results                   | Yes       |
| Interpretation                | Yes       |
| Generalizability/Strengths    | Yes       |
| Limitations                   | Yes       |
| <b>Other information</b>      |           |
| Funding                       | Yes       |
| Competing Interest Statement: | Yes       |
| Ethical Approval Statement    | Yes       |
| Contributorship Statement     | Yes       |
